# Supplementary material for: Involvement of MAF/SPP1 axis in the development of bone marrow fibrosis in PMF patients
Source: PubMed Central journal article supplement — Leukemia. 2017 Aug 8;32(2):438–49. doi: 10.1038/leu.2017.220 (PMC5808097; doi:10.1038/leu.2017.220), 2017-08-08
Supplement: leu2017220x4.pdf [file leu2017220x4.pdf]

**Table S3. Differentially expressed genes (DEGs) in both LMAFvar1IDN vs LXIDN and LMAFvar2IDN vs LXIDN-transduced CD34+ HPCs.**

| Probeset ID   | Gene Symbol | Gene Title                                                         | RefSeq Transcript ID | FDR (LMAFVAR1IDN vs. LXIDN) | Fold-Change(LMAFVAR 1IDN vs. LXIDN) | FDR (LMAFVAR2IDN vs. LXIDN) | Fold-Change(LMAFVAR 2IDN vs. LXIDN) | FDR (LMAFVAR2IDN vs. LMAFVAR1IDN) | Fold-Change(LMAFVAR 2IDN vs. LMAFVAR 1IDN) |
|---------------|-------------|--------------------------------------------------------------------|----------------------|-----------------------------|-------------------------------------|-----------------------------|-------------------------------------|-----------------------------------|--------------------------------------------|
| 11725979_a_at | CALB1       | calbindin 1, 28kDa                                                 | NM_004929            | 0,0281                      | 78,0309                             | 0,0367                      | 44,7699                             | 0,9906                            | -1,7429                                    |
| 11719684_a_at | NTS         | neurotensin                                                        | NM_006183            | 0,0269                      | 73,0019                             | 0,0327                      | 66,7170                             | 0,9949                            | -1,0942                                    |
| 11754472_a_at | CALB1       | calbindin 1, 28kDa                                                 | NM_004929            | 0,0282                      | 47,3451                             | 0,0381                      | 25,9458                             | 0,9906                            | -1,8248                                    |
| 11755730_x_at | SPP1        | secreted phosphoprotein 1                                          | NM_000582 /// ↑      | 0,0366                      | 31,5761                             | 0,0476                      | 22,4343                             | 0,9906                            | -1,4075                                    |
| 11723068_at   | CRHBP       | corticotropin releasing hormone binding protein                    | NM_001882            | 0,0266                      | 30,9736                             | 0,0333                      | 22,2337                             | 0,9906                            | -1,3931                                    |
| 11737943_a_at | SPP1        | secreted phosphoprotein 1                                          | NM_000582 /// ↑      | 0,0343                      | 25,7248                             | 0,0443                      | 19,2564                             | 0,9910                            | -1,3359                                    |
| 11716384_at   | CCL2        | chemokine (C-C motif) ligand 2                                     | NM_002982            | 0,0302                      | 18,3654                             | 0,0360                      | 16,1870                             | 0,9910                            | -1,1346                                    |
| 11752076_s_at | SEPT10      | septin 10                                                          | NM_144710 /// ↑      | 0,0212                      | 15,9336                             | 0,0231                      | 18,2133                             | 0,9906                            | 1,1431                                     |
| 11719853_s_at | SEPT10      | septin 10                                                          | NM_144710 /// ↑      | 0,0251                      | 15,0360                             | 0,0269                      | 17,2773                             | 0,9906                            | 1,1491                                     |
| 11741434_s_at | SEPT10      | septin 10                                                          | NM_144710 /// ↑      | 0,0338                      | 14,4201                             | 0,0359                      | 17,0318                             | 0,9906                            | 1,1811                                     |
| 11724931_a_at | MERTK       | c-mer proto-oncogene tyrosine kinase                               | NM_006343            | 0,0212                      | 14,2657                             | 0,0231                      | 14,1249                             | 0,9992                            | -1,0100                                    |
| 11729094_a_at | GAD1        | glutamate decarboxylase 1 (brain, 67kDa)                           | NM_000817 /// ↑      | 0,0277                      | 13,5590                             | 0,0342                      | 11,6039                             | 0,9906                            | -1,1685                                    |
| 11739503_at   | ABCA1       | ATP-binding cassette, sub-family A (ABC1), mem1                    | NM_005502            | 0,0251                      | 12,7932                             | 0,0338                      | 6,8480                              | 0,9906                            | -1,8682                                    |
| 11722159_a_at | SLC7A8      | solute carrier family 7 (amino acid transporter high affinity)     | NM_001267036         | 0,0346                      | 11,9403                             | 0,0447                      | 8,9381                              | 0,9906                            | -1,3359                                    |
| 11763851_a_at | CRHBP       | corticotropin releasing hormone binding protein                    | NM_001882            | 0,0272                      | 11,6233                             | 0,0394                      | 6,7958                              | 0,9906                            | -1,7104                                    |
| 11733355_x_at | C5AR1       | complement component 5a receptor 1                                 | NM_001736            | 0,0280                      | 10,4510                             | 0,0352                      | 8,7379                              | 0,9906                            | -1,1961                                    |
| 11748110_a_at | LGMN        | legumain                                                           | NM_001008530         | 0,0341                      | 10,0064                             | 0,0480                      | 6,5881                              | 0,9906                            | -1,5189                                    |
| 11720994_x_at | CCL3        | chemokine (C-C motif) ligand 3 /// c-C motif chemokine 3           | NM_002983 /// >      | 0,0457                      | 9,9040                              | 0,0367                      | 8,8956                              | 0,9949                            | -1,1134                                    |
| 11746287_x_at | LGMN        | legumain                                                           | NM_001008530         | 0,0311                      | 9,3539                              | 0,0459                      | 5,6740                              | 0,9906                            | -1,6486                                    |
| 11733729_s_at | LGMN        | legumain                                                           | NM_001008530         | 0,0337                      | 8,9239                              | 0,0433                      | 6,9732                              | 0,9906                            | -1,2797                                    |
| 11752744_a_at | LGMN        | legumain                                                           | NM_001008530         | 0,0288                      | 8,9209                              | 0,0411                      | 5,8186                              | 0,9906                            | -1,5332                                    |
| 11741079_x_at | CREM        | cAMP responsive element modulator                                  | NM_001267562         | 0,0258                      | 8,7346                              | 0,0302                      | 7,8946                              | 0,9906                            | -1,1064                                    |
| 11743732_a_at | RCAN1       | regulator of calcineurin 1                                         | NM_004414 /// ↑      | 0,0237                      | 8,6324                              | 0,0275                      | 6,9419                              | 0,9906                            | -1,2435                                    |
| 11743733_s_at | RCAN1       | regulator of calcineurin 1                                         | NM_004414 /// ↑      | 0,0252                      | 8,3257                              | 0,0282                      | 7,8601                              | 0,9916                            | -1,0592                                    |
| 11740030_s_at | CREM        | cAMP responsive element modulator                                  | NM_001267562         | 0,0429                      | 7,8444                              | 0,0447                      | 9,1123                              | 0,9906                            | 1,1616                                     |
| 11746995_a_at | NPL         | N-acetylneuraminate pyruvate lyase (dihydrodipicolinate dependent) | NM_001200050         | 0,0303                      | 7,7567                              | 0,0345                      | 8,1167                              | 0,9949                            | 1,0464                                     |
| 11718983_x_at | CCL4        | chemokine (C-C motif) ligand 4 /// chemokine (C-C motif) ligand 4  | NM_001001435         | 0,0457                      | 7,7355                              | 0,0405                      | 7,1814                              | 0,9951                            | -1,0772                                    |
| 11753445_a_at | HMOX1       | heme oxygenase (decycling) 1                                       | NM_002133            | 0,0337                      | 7,5756                              | 0,0451                      | 5,5472                              | 0,9906                            | -1,3657                                    |
| 11733796_s_at | RCAN1       | regulator of calcineurin 1                                         | NM_004414 /// ↑      | 0,0237                      | 7,4649                              | 0,0269                      | 7,2951                              | 0,9951                            | -1,0233                                    |
| 11731027_s_at | CREM        | cAMP responsive element modulator                                  | NM_001267562         | 0,0403                      | 7,1910                              | 0,0411                      | 8,4529                              | 0,9906                            | 1,1755                                     |
| 11740028_a_at | CREM        | cAMP responsive element modulator                                  | NM_001267562         | 0,0305                      | 7,1525                              | 0,0366                      | 6,5574                              | 0,9910                            | -1,0908                                    |
| 11723884_at   | SOWAHC      | sonosdowah ankyrin repeat domain family member 1                   | NM_023016            | 0,0271                      | 7,1194                              | 0,0326                      | 7,1782                              | 0,9997                            | 1,0083                                     |
| 11728228_at   | HAVCR2      | hepatitis A virus cellular receptor 2                              | NM_032782            | 0,0281                      | 6,9476                              | 0,0338                      | 6,5197                              | 0,9920                            | -1,0656                                    |
| 11718014_a_at | CELA2B      | chymotrypsin-like elastase family, member 2B                       | NM_015849            | 0,0212                      | 6,9259                              | 0,0231                      | 13,6610                             | 0,9906                            | 1,9725                                     |
| 11716939_a_at | HMOX1       | heme oxygenase (decycling) 1                                       | NM_002133            | 0,0414                      | 6,8027                              | 0,0494                      | 6,1388                              | 0,9915                            | -1,1082                                    |
| 11719657_a_at | MMP9        | matrix metalloproteinase 9 (gelatinase B, 92kDa glycoprotein)      | NM_004994            | 0,0427                      | 6,7834                              | 0,0375                      | 5,5583                              | 0,9910                            | -1,2204                                    |
| 11723803_a_at | TREM2       | triggering receptor expressed on myeloid cells 2                   | NM_001271821         | 0,0382                      | 6,6521                              | 0,0377                      | 8,1387                              | 0,9906                            | 1,2235                                     |
| 11718061_at   | PVALB       | parvalbumin                                                        | NM_002854            | 0,0212                      | 6,6490                              | 0,0269                      | 3,0850                              | 0,9906                            | -2,1553                                    |
| 11741874_x_at | SEPP1       | selenoprotein P, plasma, 1                                         | NM_001085486         | 0,0214                      | 6,4161                              | 0,0269                      | 5,3087                              | 0,9906                            | -1,2086                                    |
| 11723883_at   | SOWAHC      | sonosdowah ankyrin repeat domain family member 1                   | NM_023016            | 0,0311                      | 6,3999                              | 0,0344                      | 6,8932                              | 0,9916                            | 1,0771                                     |
| 11741567_x_at | SLCO2B1     | solute carrier organic anion transporter family, member 2B1        | NM_001145211         | 0,0314                      | 6,0770                              | 0,0444                      | 4,4452                              | 0,9906                            | -1,3671                                    |
| 11722728_a_at | EGR2        | early growth response 2                                            | NM_000399 /// ↑      | 0,0267                      | 5,9926                              | 0,0312                      | 5,6667                              | 0,9916                            | -1,0575                                    |
| 11724463_a_at | GNPMB       | glycoprotein (transmembrane) nmb                                   | NM_001005340         | 0,0269                      | 5,8620                              | 0,0359                      | 4,2312                              | 0,9906                            | -1,3854                                    |
| 11755337_a_at | ENPP2       | ectonucleotide pyrophosphatase/phosphodiesterase 2                 | NM_001040092         | 0,0269                      | 5,6443                              | 0,0375                      | 3,8737                              | 0,9906                            | -1,4571                                    |
| 11731433_a_at | SEPP1       | selenoprotein P, plasma, 1                                         | NM_001085486         | 0,0319                      | 5,3077                              | 0,0422                      | 4,2500                              | 0,9906                            | -1,2489                                    |
| 11717672_s_at | ENPP2       | ectonucleotide pyrophosphatase/phosphodiesterase 2                 | NM_001040092         | 0,0312                      | 5,2760                              | 0,0425                      | 4,0147                              | 0,9906                            | -1,3142                                    |
| 11753130_at   | TM4SF1      | transmembrane 4 L six family member 1                              | NM_014220            | 0,0395                      | 5,2317                              | 0,0458                      | 4,8688                              | 0,9923                            | -1,0746                                    |
| 11715931_s_at | SGK1        | serum/glucocorticoid regulated kinase 1                            | NM_001143676         | 0,0267                      | 5,0998                              | 0,0311                      | 4,8467                              | 0,9916                            | -1,0522                                    |
| 11740752_a_at | FOLR2       | folate receptor 2 (fetal)                                          | NM_000803 /// ↑      | 0,0419                      | 5,0915                              | 0,0377                      | 7,2640                              | 0,9906                            | 1,4267                                     |
| 11728763_x_at | GAL3ST4     | galactose-3-O-sulfotransferase 4                                   | NM_024637            | 0,0266                      | 5,0258                              | 0,0243                      | 9,6638                              | 0,9906                            | 1,9228                                     |
| 11717661_a_at | PPP1R16B    | protein phosphatase 1, regulatory subunit 16B                      | NM_001172735         | 0,0255                      | 4,9599                              | 0,0269                      | 5,8403                              | 0,9906                            | 1,1775                                     |
| 11759566_a_at | NPL         | N-acetylneuraminate pyruvate lyase (dihydrodipicolinate dependent) | NM_001200050         | 0,0212                      | 4,8477                              | 0,0231                      | 5,2152                              | 0,9906                            | 1,0758                                     |
| 11720263_a_at | MITF        | microphthalmia-associated transcription factor                     | NM_000248 /// ↑      | 0,0212                      | 4,7928                              | 0,0242                      | 4,4380                              | 0,9906                            | -1,0800                                    |
| 11719120_a_at | KYNU        | kynureninase                                                       | NM_001032998         | 0,0217                      | 4,7893                              | 0,0269                      | 3,8507                              | 0,9906                            | -1,2438                                    |
| 11733698_s_at | SGK1        | serum/glucocorticoid regulated kinase 1                            | NM_001143676         | 0,0214                      | 4,7278                              | 0,0243                      | 4,4341                              | 0,9906                            | -1,0662                                    |
| 11737312_at   | CCL1        | chemokine (C-C motif) ligand 1                                     | NM_002981            | 0,0221                      | 4,6211                              | 0,0234                      | 6,5592                              | 0,9906                            | 1,4194                                     |
| 11728156_s_at | LACC1       | laccase (multicopper oxidoreductase) domain containing             | NM_001128303         | 0,0312                      | 4,6092                              | 0,0359                      | 4,5118                              | 0,9962                            | -1,0216                                    |

|               |           |                                                                     |                 |        |        |        |        |        |         |
|---------------|-----------|---------------------------------------------------------------------|-----------------|--------|--------|--------|--------|--------|---------|
| 11737750_s_at | SGK1      | serum/glucocorticoid regulated kinase 1                             | NM_001143676    | 0,0232 | 4,5931 | 0,0269 | 4,2891 | 0,9906 | -1,0709 |
| 11724275_s_at | TMEM158   | transmembrane protein 158 (gene/pseudogene)                         | NM_015444       | 0,0346 | 4,5260 | 0,0422 | 4,0713 | 0,9906 | -1,1117 |
| 11716161_s_at | LBH       | limb bud and heart development                                      | NM_030915       | 0,0267 | 4,4356 | 0,0338 | 3,5931 | 0,9906 | -1,2345 |
| 11716162_at   | LBH       | limb bud and heart development                                      | NM_030915       | 0,0295 | 4,3789 | 0,0359 | 4,1034 | 0,9910 | -1,0672 |
| 11721467_s_at | CD276     | CD276 molecule                                                      | NM_001024736    | 0,0214 | 4,3137 | 0,0251 | 4,1688 | 0,9915 | -1,0348 |
| 11752395_a_at | NFATC1    | nuclear factor of activated T-cells, cytoplasmic, calcium dependent | NM_006162 /// ↑ | 0,0443 | 4,2599 | 0,0447 | 4,9337 | 0,9906 | 1,1582  |
| 11744715_a_at | SLC38A6   | solute carrier family 38, member 6                                  | NM_001172702    | 0,0269 | 4,2386 | 0,0338 | 3,6861 | 0,9906 | -1,1499 |
| 11726725_a_at | NABP1     | nucleic acid binding protein 1                                      | NM_001031716    | 0,0255 | 4,2293 | 0,0297 | 3,9664 | 0,9906 | -1,0663 |
| 11756780_a_at | MS4A7     | membrane-spanning 4-domains, subfamily A, member 7                  | NM_021201 /// ↑ | 0,0276 | 4,2127 | 0,0375 | 3,3188 | 0,9906 | -1,2693 |
| 11743350_a_at | C15orf48  | chromosome 15 open reading frame 48                                 | NM_032413 /// ↑ | 0,0214 | 4,2012 | 0,0263 | 3,7123 | 0,9906 | -1,1317 |
| 11745612_a_at | TREM2     | triggering receptor expressed on myeloid cells 2                    | NM_001271821    | 0,0255 | 4,1968 | 0,0301 | 3,7957 | 0,9906 | -1,1057 |
| 11719447_s_at | GBP2      | guanylate binding protein 2, interferon-inducible                   | NM_004120       | 0,0249 | 4,1891 | 0,0269 | 4,3949 | 0,9906 | 1,0491  |
| 11729741_x_at | CD68      | CD68 molecule                                                       | NM_001040059    | 0,0212 | 4,1849 | 0,0231 | 3,9693 | 0,9906 | -1,0543 |
| 11763367_at   | ---       | ---                                                                 | ---             | 0,0269 | 4,1746 | 0,0334 | 3,8256 | 0,9906 | -1,0912 |
| 11735045_at   | ATP6V0D2  | ATPase, H <sup>+</sup> transporting, lysosomal 38kDa, V0 subunit    | NM_152565       | 0,0287 | 4,1718 | 0,0370 | 3,5942 | 0,9906 | -1,1607 |
| 11726190_a_at | DOCK4     | dedicator of cytokinesis 4                                          | NM_014705       | 0,0413 | 4,1458 | 0,0497 | 3,7636 | 0,9906 | -1,1016 |
| 11717994_a_at | NR4A1     | nuclear receptor subfamily 4, group A, member 1                     | NM_001202233    | 0,0455 | 4,1408 | 0,0395 | 6,1249 | 0,9906 | 1,4792  |
| 11721305_a_at | PHLDA1    | pleckstrin homology-like domain, family A, member 1                 | NM_007350       | 0,0266 | 4,1392 | 0,0338 | 3,3462 | 0,9906 | -1,2370 |
| 11720062_s_at | IER3      | immediate early response 3                                          | NM_003897 /// ↑ | 0,0302 | 4,1317 | 0,0359 | 4,0015 | 0,9949 | -1,0325 |
| 11716580_s_at | CYSTM1    | cysteine-rich transmembrane module containing 1                     | NM_032412       | 0,0299 | 4,0502 | 0,0388 | 3,3786 | 0,9906 | -1,1988 |
| 11716479_s_at | F13A1     | coagulation factor XIII, A1 polypeptide                             | NM_000129       | 0,0413 | 4,0475 | 0,0494 | 3,6994 | 0,9906 | -1,0941 |
| 11734874_x_at | PPFIBP1   | PTPRF interacting protein, binding protein 1 (liprin beta 1)        | NM_001198915    | 0,0272 | 4,0394 | 0,0334 | 3,9047 | 0,9940 | -1,0345 |
| 11725175_x_at | ADAP2     | ArfGAP with dual PH domains 2                                       | NM_018404       | 0,0212 | 4,0389 | 0,0231 | 3,8193 | 0,9906 | -1,0575 |
| 11733240_at   | IRAK2     | interleukin-1 receptor-associated kinase 2                          | NM_001570       | 0,0214 | 4,0388 | 0,0252 | 3,6110 | 0,9906 | -1,1185 |
| 11754206_a_at | HIVEP2    | human immunodeficiency virus type I enhancer binding protein 2      | NM_006734       | 0,0214 | 4,0183 | 0,0251 | 3,8302 | 0,9906 | -1,0491 |
| 11740871_a_at | MS4A7     | membrane-spanning 4-domains, subfamily A, member 7                  | NM_021201 /// ↑ | 0,0276 | 3,9007 | 0,0339 | 3,5879 | 0,9906 | -1,0872 |
| 11745007_s_at | SDC2      | syndecan 2                                                          | NM_002998       | 0,0269 | 3,8406 | 0,0354 | 3,1523 | 0,9906 | -1,2184 |
| 11762406_s_at | GBP2      | guanylate binding protein 2, interferon-inducible                   | NM_004120       | 0,0321 | 3,8393 | 0,0377 | 3,6606 | 0,9923 | -1,0488 |
| 11721720_s_at | CELA2A    | chymotrypsin-like elastase family, member 2A                        | NM_033440       | 0,0414 | 3,8179 | 0,0334 | 6,9784 | 0,9906 | 1,8278  |
| 11721630_at   | MAFB      | v-maf musculoaponeurotic fibrosarcoma oncogene                      | NM_005461       | 0,0352 | 3,8015 | 0,0444 | 3,3572 | 0,9906 | -1,1324 |
| 11716716_x_at | CTSB      | cathepsin B                                                         | NM_001908 /// ↑ | 0,0308 | 3,7569 | 0,0375 | 3,4714 | 0,9906 | -1,0822 |
| 11719959_at   | SGPL1     | sphingosine-1-phosphate lyase 1                                     | NM_003901       | 0,0316 | 3,7439 | 0,0366 | 3,7052 | 0,9992 | -1,0105 |
| 11726963_s_at | SGTB      | small glutamine-rich tetratricopeptide repeat (TPR)                 | NM_019072       | 0,0237 | 3,7161 | 0,0269 | 3,5897 | 0,9915 | -1,0352 |
| 11759525_at   | GADD45B   | growth arrest and DNA-damage-inducible, beta                        | NM_015675       | 0,0286 | 3,6445 | 0,0338 | 3,7523 | 0,9949 | 1,0296  |
| 11739379_a_at | FAM198B   | family with sequence similarity 198, member B                       | NM_001031700    | 0,0255 | 3,6411 | 0,0338 | 2,8573 | 0,9906 | -1,2743 |
| 11729051_a_at | PPFIBP1   | PTPRF interacting protein, binding protein 1 (liprin beta 1)        | NM_001198915    | 0,0270 | 3,6273 | 0,0327 | 3,5811 | 0,9978 | -1,0129 |
| 11718810_at   | PRKCH     | protein kinase C, eta                                               | NM_006255       | 0,0393 | 3,6127 | 0,0411 | 3,8243 | 0,9920 | 1,0586  |
| 11742911_at   | IGSF6     | immunoglobulin superfamily, member 6                                | NM_005849       | 0,0269 | 3,6081 | 0,0320 | 3,6215 | 0,9997 | 1,0037  |
| 11740896_s_at | MIR22 /// | microRNA 22 /// MIR22 host gene (non-protein coding)                | NM_001001870    | 0,0413 | 3,5908 | 0,0491 | 3,3794 | 0,9919 | -1,0625 |
| 11746798_x_at | SDC2      | syndecan 2                                                          | NM_002998       | 0,0335 | 3,5104 | 0,0484 | 2,7020 | 0,9906 | -1,2992 |
| 11743071_a_at | LPAR6     | lysophosphatidic acid receptor 6                                    | NM_001162497    | 0,0426 | 3,4945 | 0,0494 | 3,3371 | 0,9940 | -1,0472 |
| 11729424_s_at | CCRL2     | chemokine (C-C motif) receptor-like 2                               | NM_001130910    | 0,0283 | 3,4829 | 0,0351 | 3,2630 | 0,9906 | -1,0674 |
| 11726727_a_at | NABP1     | nucleic acid binding protein 1                                      | NM_001031716    | 0,0312 | 3,4829 | 0,0387 | 3,1081 | 0,9906 | -1,1206 |
| 11717886_a_at | PLAU      | plasminogen activator, urokinase                                    | NM_001145031    | 0,0399 | 3,4780 | 0,0444 | 3,5332 | 0,9985 | 1,0159  |
| 11725174_a_at | ADAP2     | ArfGAP with dual PH domains 2                                       | NM_018404       | 0,0285 | 3,4707 | 0,0384 | 2,8891 | 0,9906 | -1,2013 |
| 11755248_x_at | PPFIBP1   | PTPRF interacting protein, binding protein 1 (liprin beta 1)        | NM_001198915    | 0,0363 | 3,4639 | 0,0395 | 3,5345 | 0,9962 | 1,0204  |
| 11737428_a_at | MSR1      | macrophage scavenger receptor 1                                     | NM_002445 /// ↑ | 0,0281 | 3,4493 | 0,0340 | 3,3063 | 0,9916 | -1,0432 |
| 11718841_s_at | IL8       | interleukin 8                                                       | NM_000584       | 0,0214 | 3,4373 | 0,0251 | 3,3354 | 0,9910 | -1,0305 |
| 11754777_a_at | SH2D2A    | SH2 domain containing 2A                                            | NM_001161441    | 0,0458 | 3,4330 | 0,0426 | 4,4741 | 0,9906 | 1,3033  |
| 11757798_s_at | MAFB      | v-maf musculoaponeurotic fibrosarcoma oncogene                      | NM_005461       | 0,0346 | 3,4231 | 0,0444 | 3,0336 | 0,9906 | -1,1284 |
| 11733799_a_at | SLC31A2   | solute carrier family 31 (copper transporters), member 2            | NM_001860       | 0,0268 | 3,4181 | 0,0334 | 3,0590 | 0,9906 | -1,1174 |
| 11744435_a_at | DUSP6     | dual specificity phosphatase 6                                      | NM_001946 /// ↑ | 0,0369 | 3,4104 | 0,0377 | 3,7363 | 0,9906 | 1,0956  |
| 11726726_s_at | NABP1     | nucleic acid binding protein 1                                      | NM_001031716    | 0,0255 | 3,4073 | 0,0275 | 3,4341 | 0,9992 | 1,0079  |
| 11740872_a_at | MS4A7     | membrane-spanning 4-domains, subfamily A, member 7                  | NM_021201 /// ↑ | 0,0255 | 3,3805 | 0,0289 | 3,2970 | 0,9941 | -1,0253 |
| 11740113_x_at | NIPSNAP3  | nipsnap homolog 3B (C. elegans)                                     | NM_018376       | 0,0212 | 3,3642 | 0,0231 | 3,0778 | 0,9906 | -1,0930 |
| 11716974_a_at | PDK4      | pyruvate dehydrogenase kinase, isozyme 4                            | NM_002612       | 0,0288 | 3,3440 | 0,0359 | 3,1177 | 0,9906 | -1,0726 |
| 11754810_a_at | ITGB5     | integrin, beta 5                                                    | NM_002213       | 0,0237 | 3,3426 | 0,0284 | 2,8299 | 0,9906 | -1,1812 |
| 11746878_s_at | ID2       | inhibitor of DNA binding 2, dominant negative helix-loop-helix      | NM_002166       | 0,0338 | 3,3317 | 0,0377 | 3,3521 | 0,9997 | 1,0061  |
| 11741980_a_at | DUSP6     | dual specificity phosphatase 6                                      | NM_001946 /// ↑ | 0,0269 | 3,3139 | 0,0298 | 3,5589 | 0,9906 | 1,0739  |
| 11720836_a_at | RIN2      | Ras and Rab interactor 2                                            | NM_001242581    | 0,0214 | 3,2961 | 0,0252 | 3,1250 | 0,9906 | -1,0548 |
| 11725937_a_at | LGALS3    | lectin, galactoside-binding, soluble, 3                             | NM_001177388    | 0,0212 | 3,2887 | 0,0242 | 2,8915 | 0,9906 | -1,1374 |
| 11743288_at   | PEAK1     | NKF3 kinase family member                                           | NM_024776       | 0,0212 | 3,2839 | 0,0231 | 3,5661 | 0,9906 | 1,0859  |
| 11731281_a_at | NFATC1    | nuclear factor of activated T-cells, cytoplasmic, calcium dependent | NM_006162 /// ↑ | 0,0427 | 3,2833 | 0,0401 | 3,9877 | 0,9906 | 1,2145  |
| 11744618_a_at | DUSP6     | dual specificity phosphatase 6                                      | NM_001946 /// ↑ | 0,0478 | 3,2509 | 0,0488 | 3,7464 | 0,9906 | 1,1524  |
| 11755796_a_at | ADAM9     | ADAM metallopeptidase domain 9                                      | NM_001005845    | 0,0212 | 3,2339 | 0,0242 | 2,8758 | 0,9906 | -1,1245 |
| 11725987_a_at | MMP14     | matrix metallopeptidase 14 (membrane-inserted)                      | NM_004995       | 0,0341 | 3,2287 | 0,0375 | 3,3411 | 0,9942 | 1,0348  |

|               |              |                                                      |                 |        |        |        |        |        |         |
|---------------|--------------|------------------------------------------------------|-----------------|--------|--------|--------|--------|--------|---------|
| 11755695_a_at | FUCA1        | fucosidase, alpha-L- 1, tissue                       | NM_000147       | 0,0296 | 3,1838 | 0,0384 | 2,7481 | 0,9906 | -1,1586 |
| 11723641_a_at | FUCA1        | fucosidase, alpha-L- 1, tissue                       | NM_000147       | 0,0341 | 3,1704 | 0,0444 | 2,7542 | 0,9906 | -1,1511 |
| 11758147_s_at | MAPK13       | mitogen-activated protein kinase 13                  | NM_002754 /// ↑ | 0,0306 | 3,1572 | 0,0351 | 3,2074 | 0,9962 | 1,0159  |
| 11758263_s_at | CYBB         | cytochrome b-245, beta polypeptide                   | NM_000397       | 0,0277 | 3,1383 | 0,0342 | 2,9268 | 0,9906 | -1,0723 |
| 11728265_a_at | LILRB2       | leukocyte immunoglobulin-like receptor, subfamily    | NM_001080978    | 0,0214 | 3,1205 | 0,0243 | 3,0891 | 0,9953 | -1,0102 |
| 11715994_x_at | ID2          | inhibitor of DNA binding 2, dominant negative heli   | NM_002166       | 0,0248 | 3,1068 | 0,0269 | 3,0925 | 0,9997 | -1,0046 |
| 11717118_a_at | P4HA2        | prolyl 4-hydroxylase, alpha polypeptide II           | NM_001017973    | 0,0447 | 3,1027 | 0,0483 | 3,2678 | 0,9923 | 1,0532  |
| 11719344_a_at | ATF3         | activating transcription factor 3                    | NM_001030287    | 0,0426 | 3,0891 | 0,0470 | 3,1324 | 0,9989 | 1,0140  |
| 11757534_s_at | FAM198B      | family with sequence similarity 198, member B        | NM_001031700    | 0,0237 | 3,0850 | 0,0269 | 2,8919 | 0,9906 | -1,0668 |
| 11743289_s_at | PEAK1        | NKF3 kinase family member                            | NM_024776       | 0,0412 | 3,0823 | 0,0400 | 3,5454 | 0,9906 | 1,1502  |
| 11759343_x_at | FMN1         | formin 1                                             | NM_001103184    | 0,0475 | 3,0738 | 0,0500 | 3,3630 | 0,9906 | 1,0941  |
| 11729053_x_at | PPFIBP1      | PTPRF interacting protein, binding protein 1 (lipri  | NM_001198915    | 0,0269 | 3,0425 | 0,0338 | 2,7929 | 0,9906 | -1,0894 |
| 11755797_x_at | ADAM9        | ADAM metallopeptidase domain 9                       | NM_001005845    | 0,0237 | 3,0370 | 0,0286 | 2,6015 | 0,9906 | -1,1674 |
| 11720440_at   | OLFML2B      | olfactomedin-like 2B                                 | NM_015441       | 0,0279 | 3,0094 | 0,0470 | 2,1306 | 0,9906 | -1,4125 |
| 11728423_a_at | PILRA        | paired immunoglobulin-like type 2 receptor alpha     | NM_013439 /// ↑ | 0,0271 | 2,9931 | 0,0353 | 2,6396 | 0,9906 | -1,1339 |
| 11754989_a_at | DMXL2        | Dmx-like 2                                           | NM_001174116    | 0,0428 | 2,9796 | 0,0447 | 3,2123 | 0,9906 | 1,0781  |
| 11721099_at   | C3AR1        | complement component 3a receptor 1                   | NM_004054       | 0,0399 | 2,9287 | 0,0488 | 2,6852 | 0,9906 | -1,0907 |
| 11726611_x_at | MAFF         | v-maf musculoaponeurotic fibrosarcoma oncogen        | NM_001161572    | 0,0445 | 2,9223 | 0,0401 | 3,6794 | 0,9906 | 1,2591  |
| 11743000_at   | CD83         | CD83 molecule                                        | NM_001040280    | 0,0248 | 2,9131 | 0,0269 | 3,0390 | 0,9906 | 1,0432  |
| 11757868_a_at | PIK3IP1      | phosphoinositide-3-kinase interacting protein 1      | NM_001135911    | 0,0407 | 2,9045 | 0,0434 | 3,0604 | 0,9916 | 1,0537  |
| 11716019_at   | RAB31        | RAB31, member RAS oncogene family                    | NM_006868       | 0,0337 | 2,8894 | 0,0422 | 2,6092 | 0,9906 | -1,1074 |
| 11724509_a_at | PMAIP1       | phorbol-12-myristate-13-acetate-induced protein 1    | NM_021127       | 0,0212 | 2,8830 | 0,0231 | 2,5628 | 0,9906 | -1,1249 |
| 11755223_a_at | JHDM1D       | jumonji C domain containing histone demethylase      | NM_030647       | 0,0316 | 2,8702 | 0,0359 | 2,8917 | 0,9993 | 1,0075  |
| 11722049_a_at | DUSP6        | dual specificity phosphatase 6                       | NM_001946 /// ↑ | 0,0302 | 2,8693 | 0,0334 | 3,1454 | 0,9906 | 1,0962  |
| 11736065_x_at | P2RX7        | purinergic receptor P2X, ligand-gated ion channel    | NM_002562 /// ↑ | 0,0297 | 2,8667 | 0,0344 | 2,8867 | 0,9993 | 1,0070  |
| 11741990_s_at | CCRL2        | chemokine (C-C motif) receptor-like 2                | NM_001130910    | 0,0390 | 2,8660 | 0,0494 | 2,5333 | 0,9906 | -1,1313 |
| 11741223_s_at | FAM198B      | family with sequence similarity 198, member B        | NM_001031700    | 0,0237 | 2,8570 | 0,0269 | 2,6573 | 0,9906 | -1,0752 |
| 11730096_a_at | BCL2A1       | BCL2-related protein A1                              | NM_001114735    | 0,0391 | 2,8475 | 0,0411 | 2,9660 | 0,9923 | 1,0416  |
| 11744128_x_at | CXCL2        | chemokine (C-X-C motif) ligand 2                     | NM_002089       | 0,0269 | 2,8398 | 0,0289 | 3,0480 | 0,9906 | 1,0733  |
| 11734614_a_at | GABRE ///    | gamma-aminobutyric acid (GABA) A receptor, eps       | NM_004961 /// ↑ | 0,0302 | 2,8377 | 0,0384 | 2,5398 | 0,9906 | -1,1173 |
| 11717836_a_at | AIF1         | allograft inflammatory factor 1                      | NM_001623 /// ↑ | 0,0237 | 2,8147 | 0,0251 | 3,1689 | 0,9906 | 1,1258  |
| 11757860_s_at | QKI          | QKI, KH domain containing, RNA binding               | NM_006775 /// ↑ | 0,0212 | 2,7775 | 0,0231 | 2,7248 | 0,9906 | -1,0193 |
| 11734938_x_at | CSF2RA       | colony stimulating factor 2 receptor, alpha, low-aff | NM_001161529    | 0,0302 | 2,7707 | 0,0359 | 2,6577 | 0,9910 | -1,0425 |
| 11732585_a_at | IL1RAP       | interleukin 1 receptor accessory protein             | NM_001167928    | 0,0377 | 2,7703 | 0,0384 | 3,0152 | 0,9906 | 1,0884  |
| 11743062_a_at | PLAUR        | plasminogen activator, urokinase receptor            | NM_001005376    | 0,0368 | 2,7660 | 0,0461 | 2,4860 | 0,9906 | -1,1127 |
| 11755766_x_at | SNX30        | sorting nexin family member 30                       | NM_001012994    | 0,0357 | 2,7634 | 0,0377 | 2,9311 | 0,9906 | 1,0607  |
| 11731679_x_at | FAM20C       | family with sequence similarity 20, member C         | NM_020223       | 0,0214 | 2,7466 | 0,0245 | 2,6513 | 0,9906 | -1,0359 |
| 11755606_x_at | IFI30 /// PI | interferon, gamma-inducible protein 30 /// phosph    | NM_005027 /// ↑ | 0,0255 | 2,7443 | 0,0312 | 2,4962 | 0,9906 | -1,0994 |
| 11744067_s_at | SYNGR2       | synaptogyrin 2                                       | NM_004710       | 0,0277 | 2,7405 | 0,0359 | 2,4171 | 0,9906 | -1,1338 |
| 11721347_a_at | MPEG1        | macrophage expressed 1                               | NM_001039396    | 0,0266 | 2,7398 | 0,0327 | 2,5007 | 0,9906 | -1,0956 |
| 11716743_s_at | TJP2         | tight junction protein 2                             | NM_001170414    | 0,0447 | 2,7356 | 0,0462 | 2,9584 | 0,9906 | 1,0815  |
| 11726962_at   | SGTB         | small glutamine-rich tetratricopeptide repeat (TPR   | NM_019072       | 0,0212 | 2,7276 | 0,0231 | 2,8868 | 0,9906 | 1,0584  |
| 11746363_x_at | SYNGR2       | synaptogyrin 2                                       | NM_004710       | 0,0269 | 2,7081 | 0,0340 | 2,4658 | 0,9906 | -1,0983 |
| 11732349_at   | LILRA6       | leukocyte immunoglobulin-like receptor, subfamily    | NM_024318 /// > | 0,0413 | 2,7000 | 0,0465 | 2,6851 | 0,9997 | -1,0056 |
| 11758208_s_at | KLF2         | Kruppel-like factor 2 (lung)                         | NM_016270       | 0,0311 | 2,6918 | 0,0395 | 2,3937 | 0,9906 | -1,1245 |
| 11716715_a_at | CTSB         | cathepsin B                                          | NM_001908 /// ↑ | 0,0380 | 2,6676 | 0,0480 | 2,4028 | 0,9906 | -1,1102 |
| 11723186_at   | FGD6         | FYVE, RhoGEF and PH domain containing 6              | NM_018351       | 0,0466 | 2,6592 | 0,0494 | 2,8713 | 0,9906 | 1,0797  |
| 11717703_a_at | KIFC3        | kinesin family member C3                             | NM_001130099    | 0,0363 | 2,6590 | 0,0387 | 2,7470 | 0,9937 | 1,0331  |
| 11734529_x_at | PILRA        | paired immunoglobulin-like type 2 receptor alpha     | NM_013439 /// ↑ | 0,0237 | 2,6584 | 0,0286 | 2,3409 | 0,9906 | -1,1356 |
| 11722111_at   | HLX          | H2.0-like homeobox                                   | NM_021958       | 0,0341 | 2,6522 | 0,0338 | 3,0850 | 0,9906 | 1,1632  |
| 11732432_a_at | GK           | glycerol kinase                                      | NM_000167 /// ↑ | 0,0271 | 2,6461 | 0,0334 | 2,5679 | 0,9923 | -1,0305 |
| 11743063_x_at | PLAUR        | plasminogen activator, urokinase receptor            | NM_001005376    | 0,0285 | 2,6454 | 0,0382 | 2,2987 | 0,9906 | -1,1508 |
| 11723769_at   | SNX24        | sorting nexin 24                                     | NM_014035       | 0,0448 | 2,6412 | 0,0395 | 3,3672 | 0,9906 | 1,2749  |
| 11728477_at   | CXCL3        | chemokine (C-X-C motif) ligand 3                     | NM_002090       | 0,0357 | 2,6342 | 0,0360 | 2,9193 | 0,9906 | 1,1082  |
| 11736141_a_at | ITSN1        | intersectin 1 (SH3 domain protein)                   | NM_001001132    | 0,0248 | 2,6297 | 0,0360 | 1,9034 | 0,9906 | -1,3816 |
| 11744127_at   | CXCL2        | chemokine (C-X-C motif) ligand 2                     | NM_002089       | 0,0312 | 2,6244 | 0,0353 | 2,6926 | 0,9945 | 1,0260  |
| 11740895_a_at | MIR22 /// M  | microRNA 22 /// MIR22 host gene (non-protein co      | NM_001001870    | 0,0351 | 2,6139 | 0,0422 | 2,4760 | 0,9906 | -1,0557 |
| 11755643_a_at | TNS3         | tensin 3                                             | NM_022748       | 0,0276 | 2,5963 | 0,0338 | 2,5162 | 0,9916 | -1,0318 |
| 11732433_s_at | GK           | glycerol kinase                                      | NM_000167 /// ↑ | 0,0269 | 2,5873 | 0,0308 | 2,6914 | 0,9906 | 1,0402  |
| 11719483_a_at | P2RX4        | purinergic receptor P2X, ligand-gated ion channel    | NM_001256796    | 0,0490 | 2,5831 | 0,0483 | 3,0020 | 0,9906 | 1,1622  |
| 11738858_x_at | CSF2RA       | colony stimulating factor 2 receptor, alpha, low-aff | NM_001161529    | 0,0413 | 2,5783 | 0,0494 | 2,4302 | 0,9906 | -1,0610 |
| 11731197_a_at | PRR5L        | proline rich 5 like                                  | NM_001160167    | 0,0312 | 2,5773 | 0,0442 | 2,1757 | 0,9906 | -1,1846 |
| 11742657_x_at | HIST2H2A,    | histone cluster 2, H2aa3 /// histone cluster 2, H2a; | NM_001040874    | 0,0289 | 2,5756 | 0,0384 | 2,2616 | 0,9906 | -1,1389 |
| 11719307_a_at | RASSF4       | Ras association (RalGDS/AF-6) domain family me       | NM_032023 /// ↑ | 0,0450 | 2,5680 | 0,0447 | 2,9075 | 0,9906 | 1,1322  |
| 11718861_a_at | HCK          | hemopoietic cell kinase                              | NM_001172129    | 0,0346 | 2,5677 | 0,0447 | 2,2878 | 0,9906 | -1,1224 |
| 11725989_x_at | MMP14        | matrix metallopeptidase 14 (membrane-inserted)       | NM_004995       | 0,0445 | 2,5673 | 0,0484 | 2,6566 | 0,9949 | 1,0348  |

|               |              |                                                     |                  |        |        |        |        |        |         |
|---------------|--------------|-----------------------------------------------------|------------------|--------|--------|--------|--------|--------|---------|
| 11732188_at   | PI4K2A       | phosphatidylinositol 4-kinase type 2 alpha          | NM_018425        | 0,0266 | 2,5599 | 0,0313 | 2,4254 | 0,9906 | -1,0554 |
| 11750359_x_at | CD68 // S    | CD68 molecule // small nucleolar RNA, H/ACA bc      | NM_001040059     | 0,0325 | 2,5553 | 0,0422 | 2,2835 | 0,9906 | -1,1190 |
| 11757306_s_at | CD59         | CD59 molecule, complement regulatory protein        | NM_000611 /// ↑  | 0,0314 | 2,5402 | 0,0405 | 2,2728 | 0,9906 | -1,1177 |
| 11736375_a_at | CD86         | CD86 molecule                                       | NM_001206924     | 0,0271 | 2,5395 | 0,0395 | 2,0552 | 0,9906 | -1,2357 |
| 11759037_s_at | IL6ST        | interleukin 6 signal transducer (gp130, oncostatin  | NM_001190981     | 0,0314 | 2,5366 | 0,0409 | 2,2483 | 0,9906 | -1,1282 |
| 11758557_s_at | ZFP36L1      | ZFP36 ring finger protein-like 1                    | NM_001244698     | 0,0212 | 2,5360 | 0,0231 | 2,7214 | 0,9906 | 1,0731  |
| 11719827_a_at | QPCT         | glutaminy-peptide cyclotransferase                  | NM_012413        | 0,0266 | 2,5204 | 0,0277 | 2,7013 | 0,9906 | 1,0718  |
| 11754833_a_at | TLR2         | toll-like receptor 2                                | NM_003264        | 0,0214 | 2,5184 | 0,0263 | 2,2022 | 0,9906 | -1,1436 |
| 11719958_at   | SGPL1        | sphingosine-1-phosphate lyase 1                     | NM_003901        | 0,0212 | 2,5114 | 0,0231 | 2,4907 | 0,9949 | -1,0083 |
| 11726823_at   | ADORA3       | adenosine A3 receptor                               | NM_000677 /// ↑  | 0,0451 | 2,5041 | 0,0494 | 2,5874 | 0,9949 | 1,0333  |
| 11723217_x_at | SFXN3        | sideroflexin 3                                      | NM_030971        | 0,0456 | 2,4982 | 0,0447 | 2,8920 | 0,9906 | 1,1577  |
| 11717758_x_at | RALA         | v-ral simian leukemia viral oncogene homolog A (    | NM_005402        | 0,0212 | 2,4938 | 0,0231 | 2,4867 | 0,9995 | -1,0029 |
| 11756897_x_at | TJP2         | tight junction protein 2                            | NM_001170414     | 0,0447 | 2,4830 | 0,0488 | 2,5758 | 0,9937 | 1,0374  |
| 11727814_at   | UBASH3B      | ubiquitin associated and SH3 domain containing E    | NM_032873        | 0,0373 | 2,4786 | 0,0394 | 2,5700 | 0,9923 | 1,0369  |
| 11721960_a_at | SNX30        | sorting nexin family member 30                      | NM_001012994     | 0,0376 | 2,4775 | 0,0388 | 2,6203 | 0,9906 | 1,0576  |
| 11723477_x_at | SLC17A5      | solute carrier family 17 (anion/sugar transporter), | NM_012434        | 0,0345 | 2,4755 | 0,0411 | 2,3362 | 0,9906 | -1,0596 |
| 11741085_a_at | APLP2        | amyloid beta (A4) precursor-like protein 2          | NM_001142276     | 0,0212 | 2,4683 | 0,0231 | 2,5785 | 0,9906 | 1,0446  |
| 11717891_a_at | ECM1         | extracellular matrix protein 1                      | NM_001202858     | 0,0279 | 2,4587 | 0,0358 | 2,2607 | 0,9906 | -1,0876 |
| 11742819_at   | PLAUR        | plasminogen activator, urokinase receptor           | NM_001005376     | 0,0365 | 2,4561 | 0,0422 | 2,3764 | 0,9923 | -1,0335 |
| 11757816_s_at | MARCKS       | myristoylated alanine-rich protein kinase C substr  | NM_002356        | 0,0237 | 2,4504 | 0,0269 | 2,3095 | 0,9906 | -1,0610 |
| 11716051_at   | LAMC1        | laminin, gamma 1 (formerly LAMB2)                   | NM_002293        | 0,0212 | 2,4471 | 0,0231 | 2,6252 | 0,9906 | 1,0728  |
| 11736273_a_at | TLR2         | toll-like receptor 2                                | NM_003264        | 0,0324 | 2,4459 | 0,0410 | 2,2180 | 0,9906 | -1,1028 |
| 11724997_a_at | CD86         | CD86 molecule                                       | NM_001206924     | 0,0305 | 2,4439 | 0,0359 | 2,4249 | 0,9992 | -1,0078 |
| 11757383_a_at | CTSH         | cathepsin H                                         | NM_004390 /// ↑  | 0,0214 | 2,4341 | 0,0252 | 2,2942 | 0,9906 | -1,0610 |
| 11751242_s_at | FCGR2A // Fc | fragment of IgG, low affinity IIa, receptor (CD32)  | NM_001005410     | 0,0280 | 2,4300 | 0,0388 | 2,0554 | 0,9906 | -1,1823 |
| 11727816_at   | UBASH3B      | ubiquitin associated and SH3 domain containing E    | NM_032873        | 0,0269 | 2,4286 | 0,0286 | 2,6642 | 0,9906 | 1,0970  |
| 11716742_a_at | TJP2         | tight junction protein 2                            | NM_001170414     | 0,0332 | 2,4244 | 0,0351 | 2,6245 | 0,9906 | 1,0825  |
| 11721957_at   | YPEL2        | yippee-like 2 (Drosophila)                          | NM_001005404     | 0,0442 | 2,4173 | 0,0377 | 3,1134 | 0,9906 | 1,2879  |
| 11718647_at   | ACVR1        | activin A receptor, type I                          | NM_0011105 /// ↑ | 0,0302 | 2,4159 | 0,0338 | 2,5487 | 0,9906 | 1,0550  |
| 11733115_a_at | CA2          | carbonic anhydrase II                               | NM_000067        | 0,0346 | 2,4080 | 0,0494 | 2,0301 | 0,9906 | -1,1861 |
| 11732469_at   | IL3RA        | interleukin 3 receptor, alpha (low affinity)        | NM_001267713     | 0,0413 | 2,4042 | 0,0422 | 2,5810 | 0,9906 | 1,0735  |
| 11735511_x_at | PHTF2        | putative homeodomain transcription factor 2         | NM_001127357     | 0,0312 | 2,3854 | 0,0388 | 2,1901 | 0,9906 | -1,0892 |
| 11718811_s_at | PRKCH        | protein kinase C, eta                               | NM_006255        | 0,0269 | 2,3761 | 0,0286 | 2,6493 | 0,9906 | 1,1150  |
| 11723476_at   | SLC17A5      | solute carrier family 17 (anion/sugar transporter), | NM_012434        | 0,0269 | 2,3439 | 0,0286 | 2,5492 | 0,9906 | 1,0876  |
| 11724107_s_at | MRPS31P1     | mitochondrial ribosomal protein S31 pseudogene      | NM_018676 /// ↑  | 0,0445 | 2,3426 | 0,0403 | 2,8046 | 0,9906 | 1,1972  |
| 11717678_at   | AVP1         | arginine vasopressin-induced 1                      | NM_021732        | 0,0373 | 2,3415 | 0,0470 | 2,1367 | 0,9906 | -1,0958 |
| 11721577_at   | TNF          | tumor necrosis factor                               | NM_000594        | 0,0214 | 2,3369 | 0,0234 | 2,6318 | 0,9906 | 1,1262  |
| 11739469_at   | TMEM87B      | transmembrane protein 87B                           | NM_032824        | 0,0399 | 2,3290 | 0,0388 | 2,5517 | 0,9906 | 1,0956  |
| 11743412_at   | OTUD1        | OTU domain containing 1                             | NM_001145373     | 0,0411 | 2,3239 | 0,0491 | 2,2139 | 0,9910 | -1,0497 |
| 11737831_a_at | FNBP1L       | formin binding protein 1-like                       | NM_001024948     | 0,0482 | 2,3158 | 0,0488 | 2,5839 | 0,9906 | 1,1158  |
| 11753292_x_at | CD44         | CD44 molecule (Indian blood group)                  | NM_000610 /// ↑  | 0,0282 | 2,3111 | 0,0384 | 2,0121 | 0,9906 | -1,1486 |
| 11718939_s_at | TNFAIP3      | tumor necrosis factor, alpha-induced protein 3      | NM_001270507     | 0,0276 | 2,3095 | 0,0274 | 2,7842 | 0,9906 | 1,2055  |
| 11752545_a_at | PDLIM5       | PDZ and LIM domain 5                                | NM_001011513     | 0,0258 | 2,3087 | 0,0302 | 2,2020 | 0,9906 | -1,0485 |
| 11721093_a_at | THBS1        | thrombospondin 1                                    | NM_003246        | 0,0395 | 2,3059 | 0,0377 | 2,6031 | 0,9906 | 1,1289  |
| 11742272_s_at | TM6SF1       | transmembrane 6 superfamily member 1                | NM_001144903     | 0,0269 | 2,3056 | 0,0320 | 2,3078 | 0,9997 | 1,0010  |
| 11717757_s_at | RALA         | v-ral simian leukemia viral oncogene homolog A (    | NM_005402        | 0,0212 | 2,2982 | 0,0231 | 2,4328 | 0,9906 | 1,0586  |
| 11729099_a_at | IL1RAP       | interleukin 1 receptor accessory protein            | NM_001167928     | 0,0442 | 2,2940 | 0,0483 | 2,3571 | 0,9949 | 1,0275  |
| 11722094_s_at | PPIC         | peptidylprolyl isomerase C (cyclophilin C)          | NM_000943        | 0,0387 | 2,2906 | 0,0359 | 2,6726 | 0,9906 | 1,1668  |
| 11719528_at   | PVRL2        | poliovirus receptor-related 2 (herpesvirus entry me | NM_001042724     | 0,0250 | 2,2856 | 0,0252 | 2,6323 | 0,9906 | 1,1517  |
| 11758167_s_at | PHTF2        | putative homeodomain transcription factor 2         | NM_001127357     | 0,0251 | 2,2846 | 0,0300 | 2,1016 | 0,9906 | -1,0870 |
| 11746940_a_at | CD9          | CD9 molecule                                        | NM_0011769       | 0,0271 | 2,2775 | 0,0359 | 2,0409 | 0,9906 | -1,1159 |
| 11736047_a_at | ANTXR2       | anthrax toxin receptor 2                            | NM_001145794     | 0,0220 | 2,2752 | 0,0252 | 2,3066 | 0,9941 | 1,0138  |
| 11719634_a_at | KLF4         | Kruppel-like factor 4 (gut)                         | NM_004235        | 0,0281 | 2,2723 | 0,0359 | 2,1098 | 0,9906 | -1,0770 |
| 11727817_at   | UBASH3B      | ubiquitin associated and SH3 domain containing E    | NM_032873        | 0,0451 | 2,2722 | 0,0458 | 2,4973 | 0,9906 | 1,0991  |
| 11719367_a_at | PLEKH02      | pleckstrin homology domain containing, family O     | NM_001195059     | 0,0413 | 2,2710 | 0,0447 | 2,3179 | 0,9951 | 1,0206  |
| 11756011_a_at | PTPRJ        | protein tyrosine phosphatase, receptor type, J      | NM_001098503     | 0,0255 | 2,2708 | 0,0301 | 2,1466 | 0,9906 | -1,0579 |
| 11758068_s_at | WDFY3        | WD repeat and FYVE domain containing 3              | NM_014991 /// ↑  | 0,0391 | 2,2685 | 0,0461 | 2,1621 | 0,9906 | -1,0492 |
| 11740880_x_at | ANXA2        | annexin A2                                          | NM_001002857     | 0,0220 | 2,2649 | 0,0269 | 2,0654 | 0,9906 | -1,0966 |
| 11746658_a_at | CD86         | CD86 molecule                                       | NM_001206924     | 0,0373 | 2,2642 | 0,0490 | 2,0233 | 0,9906 | -1,1191 |
| 11728695_at   | ARG2         | arginase 2                                          | NM_001172        | 0,0337 | 2,2622 | 0,0384 | 2,2219 | 0,9949 | -1,0181 |
| 11724500_at   | CRYBB1       | crystallin, beta B1                                 | NM_0011887       | 0,0411 | 2,2607 | 0,0269 | 4,7331 | 0,9906 | 2,0936  |
| 11757791_s_at | DUSP3        | dual specificity phosphatase 3                      | NM_004090        | 0,0341 | 2,2600 | 0,0400 | 2,1631 | 0,9906 | -1,0448 |
| 11755756_a_at | NHSL1        | NHS-like 1                                          | NM_001144060     | 0,0236 | 2,2591 | 0,0274 | 2,0533 | 0,9906 | -1,1002 |
| 11758175_s_at | SLC36A1      | solute carrier family 36 (proton/amino acid symport | NM_078483        | 0,0281 | 2,2589 | 0,0337 | 2,2676 | 0,9997 | 1,0039  |
| 11724768_s_at | FCGR2A // Fc | fragment of IgG, low affinity IIa, receptor (CD32)  | NM_001005410     | 0,0269 | 2,2482 | 0,0306 | 2,2937 | 0,9935 | 1,0203  |
| 11737921_a_at | MILR1        | mast cell immunoglobulin-like receptor 1            | NM_001085423     | 0,0269 | 2,2347 | 0,0289 | 2,3391 | 0,9906 | 1,0467  |

|               |            |                                                       |                 |        |        |        |        |        |         |
|---------------|------------|-------------------------------------------------------|-----------------|--------|--------|--------|--------|--------|---------|
| 11735242_s_at | ZC3H12C    | zinc finger CCCH-type containing 12C                  | NM_033390       | 0,0267 | 2,2323 | 0,0300 | 2,2339 | 0,9997 | 1,0007  |
| 11715387_at   | CDKN1A     | cyclin-dependent kinase inhibitor 1A (p21, Cip1)      | NM_000389 /// ↑ | 0,0212 | 2,2320 | 0,0231 | 2,3146 | 0,9906 | 1,0370  |
| 11715568_a_at | CD9        | CD9 molecule                                          | NM_001769       | 0,0282 | 2,2288 | 0,0327 | 2,3298 | 0,9906 | 1,0453  |
| 11743011_a_at | GPR137B    | G protein-coupled receptor 137B                       | NM_003272       | 0,0255 | 2,2238 | 0,0327 | 1,9615 | 0,9906 | -1,1337 |
| 11748126_a_at | TIMP2      | TIMP metalloproteinase inhibitor 2                    | NM_003255       | 0,0427 | 2,2182 | 0,0466 | 2,2599 | 0,9952 | 1,0188  |
| 11720133_a_at | PROS1      | protein S (alpha)                                     | NM_000313       | 0,0248 | 2,2175 | 0,0269 | 2,2180 | 1,0000 | 1,0002  |
| 11757635_a_at | TYROBP     | TYRO protein tyrosine kinase binding protein          | NM_001173514    | 0,0308 | 2,2172 | 0,0367 | 2,1400 | 0,9910 | -1,0360 |
| 11733841_a_at | EVI2A      | ecotropic viral integration site 2A                   | NM_001003927    | 0,0349 | 2,2162 | 0,0388 | 2,2226 | 0,9997 | 1,0029  |
| 11750189_s_at | CD44       | CD44 molecule (Indian blood group)                    | NM_000610 /// ↑ | 0,0248 | 2,2157 | 0,0289 | 2,0419 | 0,9906 | -1,0851 |
| 11740879_s_at | ANXA2      | annexin A2                                            | NM_001002857    | 0,0269 | 2,2131 | 0,0334 | 2,1124 | 0,9906 | -1,0477 |
| 11743389_s_at | PHTF2      | putative homeodomain transcription factor 2           | NM_001127357    | 0,0269 | 2,2126 | 0,0338 | 2,0903 | 0,9906 | -1,0585 |
| 11720520_s_at | LOC10099   | myomegalin-like /// myomegalin-like /// myomegali     | NM_001002810    | 0,0450 | 2,2117 | 0,0474 | 2,3610 | 0,9906 | 1,0675  |
| 11723287_at   | TYROBP     | TYRO protein tyrosine kinase binding protein          | NM_001173514    | 0,0357 | 2,2080 | 0,0434 | 2,0930 | 0,9906 | -1,0549 |
| 11743916_a_at | NPC1       | Niemann-Pick disease, type C1                         | NM_000271       | 0,0363 | 2,2078 | 0,0413 | 2,1633 | 0,9949 | -1,0206 |
| 11754064_x_at | ANXA2      | annexin A2                                            | NM_001002857    | 0,0285 | 2,2043 | 0,0388 | 1,9284 | 0,9906 | -1,1430 |
| 11716377_s_at | GRN        | granulin                                              | NM_001012479    | 0,0411 | 2,2007 | 0,0494 | 2,0903 | 0,9906 | -1,0528 |
| 11718648_s_at | ACVR1      | activin A receptor, type I                            | NM_001105 /// ↑ | 0,0285 | 2,1984 | 0,0334 | 2,2800 | 0,9906 | 1,0371  |
| 11740369_x_at | PDLIM5     | PDZ and LIM domain 5                                  | NM_001011513    | 0,0212 | 2,1981 | 0,0231 | 2,2169 | 0,9949 | 1,0086  |
| 11746025_a_at | MILR1      | mast cell immunoglobulin-like receptor 1              | NM_001085423    | 0,0457 | 2,1973 | 0,0492 | 2,3137 | 0,9910 | 1,0530  |
| 11739553_a_at | GAS7       | growth arrest-specific 7                              | NM_001130831    | 0,0212 | 2,1959 | 0,0243 | 2,0406 | 0,9906 | -1,0761 |
| 11729721_s_at | LILRA6 /// | leukocyte immunoglobulin-like receptor, subfamily     | NM_001081450    | 0,0313 | 2,1944 | 0,0359 | 2,1846 | 0,9997 | -1,0045 |
| 11722403_a_at | PLEKH01    | pleckstrin homology domain containing, family O r     | NM_016274       | 0,0285 | 2,1915 | 0,0377 | 1,9831 | 0,9906 | -1,1051 |
| 11733060_a_at | PELI1      | pellino E3 ubiquitin protein ligase 1                 | NM_020651       | 0,0251 | 2,1915 | 0,0286 | 2,0788 | 0,9906 | -1,0542 |
| 11755327_s_at | LOC15476   | family with sequence similarity 115, member C ps      | NR_015421       | 0,0251 | 2,1898 | 0,0359 | 1,7523 | 0,9906 | -1,2497 |
| 11722112_at   | ADRA2A     | adrenoceptor alpha 2A                                 | NM_000681       | 0,0480 | 2,1872 | 0,0436 | 2,6634 | 0,9906 | 1,2177  |
| 11752119_x_at | SLC17A5    | solute carrier family 17 (anion/sugar transporter),   | NM_012434       | 0,0302 | 2,1790 | 0,0433 | 1,8801 | 0,9906 | -1,1590 |
| 11715951_s_at | KCTD12     | potassium channel tetramerisation domain contain      | NM_138444       | 0,0399 | 2,1762 | 0,0436 | 2,2105 | 0,9953 | 1,0158  |
| 11743972_a_at | DDIT4      | DNA-damage-inducible transcript 4                     | NM_019058       | 0,0305 | 2,1738 | 0,0334 | 2,3759 | 0,9906 | 1,0930  |
| 11718931_a_at | SLC35D2    | solute carrier family 35, member D2                   | NM_007001       | 0,0449 | 2,1725 | 0,0417 | 2,5472 | 0,9906 | 1,1725  |
| 11744134_at   | ZSWIM6     | zinc finger, SWIM-type containing 6                   | NM_020928       | 0,0212 | 2,1608 | 0,0231 | 2,0369 | 0,9906 | -1,0609 |
| 11745848_a_at | TJP2       | tight junction protein 2                              | NM_001170414    | 0,0337 | 2,1605 | 0,0384 | 2,1227 | 0,9949 | -1,0178 |
| 11757341_s_at | OPTN       | optineurin                                            | NM_001008211    | 0,0373 | 2,1561 | 0,0371 | 2,3579 | 0,9906 | 1,0936  |
| 11734162_a_at | TFEC       | transcription factor EC                               | NM_001018058    | 0,0214 | 2,1545 | 0,0242 | 2,1752 | 0,9949 | 1,0096  |
| 11717464_at   | LXN        | latexin                                               | NM_020169       | 0,0276 | 2,1475 | 0,0303 | 2,2987 | 0,9906 | 1,0704  |
| 11731634_at   | HPGDS      | hematopoietic prostaglandin D synthase                | NM_014485       | 0,0373 | 2,1413 | 0,0353 | 2,4687 | 0,9906 | 1,1529  |
| 11730878_x_at | MYCT1      | myc target 1                                          | NM_025107       | 0,0285 | 2,1413 | 0,0269 | 2,7293 | 0,9906 | 1,2746  |
| 11757684_a_at | TPD52L2    | tumor protein D52-like 2                              | NM_001243891    | 0,0461 | 2,1345 | 0,0482 | 2,3079 | 0,9906 | 1,0812  |
| 11750190_x_at | CD44       | CD44 molecule (Indian blood group)                    | NM_000610 /// ↑ | 0,0349 | 2,1316 | 0,0399 | 2,1031 | 0,9953 | -1,0136 |
| 11744619_a_at | SNX24      | sorting nexin 24                                      | NM_014035       | 0,0341 | 2,1294 | 0,0422 | 2,0012 | 0,9906 | -1,0640 |
| 11746018_a_at | GRAMD3     | GRAM domain containing 3                              | NM_001146319    | 0,0346 | 2,1267 | 0,0465 | 1,8947 | 0,9906 | -1,1225 |
| 11753291_a_at | CD44       | CD44 molecule (Indian blood group)                    | NM_000610 /// ↑ | 0,0269 | 2,1262 | 0,0360 | 1,8342 | 0,9906 | -1,1592 |
| 11724769_x_at | FCGR2A     | Fc fragment of IgG, low affinity IIa, receptor (CD32) | NM_001136219    | 0,0251 | 2,1242 | 0,0274 | 2,0842 | 0,9923 | -1,0192 |
| 11721056_x_at | PRKX       | protein kinase, X-linked                              | NM_005044       | 0,0467 | 2,1232 | 0,0484 | 2,2996 | 0,9906 | 1,0831  |
| 11763855_x_at | CD9        | CD9 molecule                                          | NM_001769       | 0,0281 | 2,1175 | 0,0363 | 1,9410 | 0,9906 | -1,0909 |
| 11758377_s_at | TLR1       | toll-like receptor 1                                  | NM_003263       | 0,0261 | 2,1174 | 0,0311 | 2,0154 | 0,9906 | -1,0506 |
| 11716093_a_at | KLF6       | Kruppel-like factor 6                                 | NM_001008490    | 0,0408 | 2,1143 | 0,0488 | 2,0244 | 0,9910 | -1,0444 |
| 11733061_s_at | PELI1      | pellino E3 ubiquitin protein ligase 1                 | NM_020651       | 0,0374 | 2,1099 | 0,0410 | 2,1271 | 0,9989 | 1,0081  |
| 11720746_s_at | BCL6       | B-cell CLL/lymphoma 6                                 | NM_001130845    | 0,0277 | 2,1092 | 0,0334 | 2,1031 | 0,9997 | -1,0029 |
| 11715388_s_at | CDKN1A     | cyclin-dependent kinase inhibitor 1A (p21, Cip1)      | NM_000389 /// ↑ | 0,0255 | 2,1057 | 0,0275 | 2,1295 | 0,9951 | 1,0113  |
| 11742948_at   | MARCKS     | myristoylated alanine-rich protein kinase C substr    | NM_002356       | 0,0332 | 2,1055 | 0,0494 | 1,7765 | 0,9906 | -1,1852 |
| 11717465_s_at | LXN        | latexin                                               | NM_020169       | 0,0269 | 2,1037 | 0,0274 | 2,3179 | 0,9906 | 1,1018  |
| 11726961_at   | SGTB       | small glutamine-rich tetratricopeptide repeat (TPR)   | NM_019072       | 0,0392 | 2,1036 | 0,0370 | 2,3780 | 0,9906 | 1,1304  |
| 11723707_a_at | AIFM2      | apoptosis-inducing factor, mitochondrion-associat     | NM_001198696    | 0,0417 | 2,0984 | 0,0384 | 2,4248 | 0,9906 | 1,1555  |
| 11718746_x_at | ARHGAP2    | Rho GTPase activating protein 21                      | NM_020824       | 0,0393 | 2,0908 | 0,0384 | 2,2676 | 0,9906 | 1,0846  |
| 11716052_s_at | LAMC1      | laminin, gamma 1 (formerly LAMB2)                     | NM_002293       | 0,0450 | 2,0907 | 0,0470 | 2,2301 | 0,9906 | 1,0667  |
| 11717552_s_at | FNBP1L     | formin binding protein 1-like                         | NM_001024948    | 0,0294 | 2,0893 | 0,0313 | 2,3200 | 0,9906 | 1,1104  |
| 11733148_a_at | ANXA4      | annexin A4                                            | NM_001153       | 0,0399 | 2,0865 | 0,0494 | 1,9468 | 0,9906 | -1,0717 |
| 11730864_s_at | CTTNBP2    | CTTNBP2 N-terminal like                               | NM_018704       | 0,0401 | 2,0803 | 0,0408 | 2,2061 | 0,9906 | 1,0605  |
| 11737798_a_at | PROCR      | protein C receptor, endothelial                       | NM_006404       | 0,0302 | 2,0729 | 0,0441 | 1,7909 | 0,9906 | -1,1575 |
| 11735241_at   | ZC3H12C    | zinc finger CCCH-type containing 12C                  | NM_033390       | 0,0363 | 2,0688 | 0,0449 | 1,9284 | 0,9906 | -1,0728 |
| 11744829_s_at | HLA-E      | major histocompatibility complex, class I, E          | NM_005516       | 0,0337 | 2,0661 | 0,0338 | 2,3096 | 0,9906 | 1,1179  |
| 11750041_s_at | ANXA5      | annexin A5                                            | NM_001154       | 0,0377 | 2,0617 | 0,0434 | 2,0273 | 0,9951 | -1,0170 |
| 11723768_a_at | SNX24      | sorting nexin 24                                      | NM_014035       | 0,0458 | 2,0613 | 0,0491 | 2,1733 | 0,9906 | 1,0543  |
| 11716828_a_at | NPC2       | Niemann-Pick disease, type C2                         | NM_006432       | 0,0370 | 2,0611 | 0,0367 | 2,2541 | 0,9906 | 1,0936  |
| 11718979_a_at | HTATIP2    | HIV-1 Tat interactive protein 2, 30kDa                | NM_001098520    | 0,0255 | 2,0602 | 0,0279 | 2,0719 | 0,9984 | 1,0057  |
| 11752817_s_at | TPP1       | tripeptidyl peptidase I                               | NM_000391       | 0,0390 | 2,0572 | 0,0459 | 1,9731 | 0,9906 | -1,0427 |

|               |           |                                                      |                 |        |        |        |        |        |         |
|---------------|-----------|------------------------------------------------------|-----------------|--------|--------|--------|--------|--------|---------|
| 11744797_s_at | DAB2      | Dab, mitogen-responsive phosphoprotein, homolo       | NM_001244871    | 0,0269 | 2,0542 | 0,0334 | 1,9334 | 0,9906 | -1,0624 |
| 11715915_a_at | CD44      | CD44 molecule (Indian blood group)                   | NM_000610 /// ↑ | 0,0265 | 2,0532 | 0,0338 | 1,8510 | 0,9906 | -1,1093 |
| 11747282_x_at | ANXA2 /// | annexin A2 /// annexin A2 pseudogene 2               | NM_001002857    | 0,0270 | 2,0532 | 0,0353 | 1,8760 | 0,9906 | -1,0944 |
| 11718724_at   | ARRDC3    | arrestin domain containing 3                         | NM_020801       | 0,0393 | 2,0492 | 0,0344 | 2,4999 | 0,9906 | 1,2200  |
| 11727992_at   | STX11     | syntaxin 11                                          | NM_003764       | 0,0345 | 2,0457 | 0,0422 | 1,9364 | 0,9906 | -1,0564 |
| 11745902_a_at | NPC2      | Niemann-Pick disease, type C2                        | NM_006432       | 0,0220 | 2,0414 | 0,0245 | 2,1407 | 0,9906 | 1,0486  |
| 11716095_s_at | KLF6      | Kruppel-like factor 6                                | NM_001008490    | 0,0314 | 2,0327 | 0,0370 | 1,9922 | 0,9940 | -1,0203 |
| 11739617_x_at | CD44      | CD44 molecule (Indian blood group)                   | NM_000610 /// ↑ | 0,0312 | 2,0320 | 0,0370 | 1,9676 | 0,9910 | -1,0327 |
| 11729033_at   | ITPRIPL2  | inositol 1,4,5-trisphosphate receptor interacting pr | NM_001034841    | 0,0368 | 2,0256 | 0,0381 | 2,1195 | 0,9906 | 1,0464  |
| 11736655_a_at | PTGR1     | prostaglandin reductase 1                            | NM_001146108    | 0,0404 | 2,0223 | 0,0447 | 2,0381 | 0,9992 | 1,0078  |
| 11758221_s_at | ARRDC3    | arrestin domain containing 3                         | NM_020801       | 0,0341 | 2,0217 | 0,0405 | 1,9394 | 0,9906 | -1,0424 |
| 11735293_x_at | TNFRSF11  | tumor necrosis factor receptor superfamily, memb     | NM_001270949    | 0,0249 | 2,0198 | 0,0324 | 1,7617 | 0,9906 | -1,1465 |
| 11720134_s_at | PROS1     | protein S (alpha)                                    | NM_000313       | 0,0325 | 2,0192 | 0,0360 | 2,0568 | 0,9949 | 1,0186  |
| 11755110_a_at | LRIG1     | leucine-rich repeats and immunoglobulin-like dom     | NM_015541       | 0,0266 | 2,0153 | 0,0252 | 2,4925 | 0,9906 | 1,2368  |
| 11717568_s_at | NQO1      | NAD(P)H dehydrogenase, quinone 1                     | NM_000903 /// ↑ | 0,0401 | 2,0116 | 0,0464 | 1,9574 | 0,9926 | -1,0277 |
| 11748775_a_at | UPP1      | uridine phosphorylase 1                              | NM_003364 /// ↑ | 0,0447 | 2,0083 | 0,0456 | 2,1401 | 0,9906 | 1,0656  |
| 11754763_a_at | GNPDA1    | glucosamine-6-phosphate deaminase 1                  | NM_005471       | 0,0420 | 2,0075 | 0,0444 | 2,0987 | 0,9906 | 1,0454  |
| 11719728_s_at | SIRPA     | signal-regulatory protein alpha                      | NM_001040022    | 0,0403 | 2,0047 | 0,0491 | 1,9033 | 0,9906 | -1,0533 |
| 11717107_a_at | PDLIM5    | PDZ and LIM domain 5                                 | NM_001011513    | 0,0221 | 2,0047 | 0,0252 | 2,0068 | 0,9997 | 1,0011  |
| 11727905_a_at | IL13RA1   | interleukin 13 receptor, alpha 1                     | NM_001560       | 0,0269 | 2,0035 | 0,0296 | 2,1371 | 0,9906 | 1,0667  |
| 11718319_at   | CD93      | CD93 molecule                                        | NM_012072       | 0,0316 | 2,0012 | 0,0434 | 1,7981 | 0,9906 | -1,1129 |
| 11743113_x_at | S100A10   | S100 calcium binding protein A10                     | NM_002966       | 0,0258 | 2,0011 | 0,0353 | 1,7213 | 0,9906 | -1,1625 |
| 11724409_a_at | MARCH2    | membrane-associated ring finger (C3HC4) 2, E3        | NM_001005415    | 0,0374 | 1,9992 | 0,0377 | 2,1361 | 0,9906 | 1,0685  |
| 11749587_x_at | FCGR2A    | Fc fragment of IgG, low affinity IIa, receptor (CD32 | NM_001136219    | 0,0369 | 1,9983 | 0,0447 | 1,8951 | 0,9906 | -1,0544 |
| 11743112_at   | S100A10   | S100 calcium binding protein A10                     | NM_002966       | 0,0214 | 1,9975 | 0,0269 | 1,8280 | 0,9906 | -1,0927 |
| 11728972_a_at | PTPRJ     | protein tyrosine phosphatase, receptor type, J       | NM_001098503    | 0,0255 | 1,9949 | 0,0308 | 1,8530 | 0,9906 | -1,0766 |
| 11715949_s_at | KCTD12    | potassium channel tetramerisation domain contain     | NM_138444       | 0,0496 | 1,9947 | 0,0491 | 2,2068 | 0,9906 | 1,1063  |
| 11741959_x_at | IL6R      | interleukin 6 receptor                               | NM_000565 /// ↑ | 0,0212 | 1,9881 | 0,0231 | 2,0383 | 0,9906 | 1,0253  |
| 11743033_x_at | ANXA5     | annexin A5                                           | NM_001154       | 0,0302 | 1,9875 | 0,0359 | 1,9508 | 0,9940 | -1,0188 |
| 11754317_a_at | ANXA4     | annexin A4                                           | NM_001153       | 0,0341 | 1,9870 | 0,0366 | 2,0507 | 0,9910 | 1,0321  |
| 11758879_s_at | HLA-E     | major histocompatibility complex, class I, E         | NM_005516       | 0,0346 | 1,9834 | 0,0327 | 2,3791 | 0,9906 | 1,1995  |
| 11729406_a_at | IFNGR1    | interferon gamma receptor 1                          | NM_000416       | 0,0255 | 1,9770 | 0,0289 | 1,9486 | 0,9937 | -1,0146 |
| 11715570_x_at | CD9       | CD9 molecule                                         | NM_001769       | 0,0252 | 1,9746 | 0,0269 | 2,0051 | 0,9927 | 1,0155  |
| 11763704_a_at | SAT1      | spermidine/spermine N1-acetyltransferase 1           | NM_002970 /// ↑ | 0,0288 | 1,9708 | 0,0392 | 1,7709 | 0,9906 | -1,1129 |
| 11717099_at   | HIST1H2B  | histone cluster 1, H2bk                              | NM_080593       | 0,0426 | 1,9646 | 0,0489 | 1,9376 | 0,9954 | -1,0139 |
| 11744654_s_at | CD44      | CD44 molecule (Indian blood group)                   | NM_000610 /// ↑ | 0,0419 | 1,9578 | 0,0471 | 1,9500 | 0,9997 | -1,0040 |
| 11715569_at   | CD9       | CD9 molecule                                         | NM_001769       | 0,0303 | 1,9545 | 0,0342 | 1,9959 | 0,9923 | 1,0212  |
| 11716453_s_at | MYO1C     | myosin IC                                            | NM_001080779    | 0,0302 | 1,9513 | 0,0348 | 1,9675 | 0,9964 | 1,0083  |
| 11748910_a_at | LOC10012  | uncharacterized LOC100129518 /// superoxide dis      | NM_000636 /// ↑ | 0,0237 | 1,9483 | 0,0269 | 1,9187 | 0,9923 | -1,0154 |
| 11724836_at   | NCEH1     | neutral cholesterol ester hydrolase 1                | NM_001146276    | 0,0413 | 1,9437 | 0,0491 | 1,8769 | 0,9915 | -1,0356 |
| 11722970_a_at | CREB5 /// | cAMP responsive element binding protein 5 /// un     | NM_001011666    | 0,0288 | 1,9414 | 0,0351 | 1,8993 | 0,9923 | -1,0222 |
| 11731633_at   | HPGDS     | hematopoietic prostaglandin D synthase               | NM_014485       | 0,0327 | 1,9345 | 0,0338 | 2,1275 | 0,9906 | 1,0998  |
| 11715926_s_at | PLEC      | plectin                                              | NM_000445 /// ↑ | 0,0316 | 1,9330 | 0,0384 | 1,8450 | 0,9906 | -1,0477 |
| 11758318_s_at | CSTB      | cystatin B (stefin B)                                | NM_000100       | 0,0271 | 1,9316 | 0,0338 | 1,8460 | 0,9906 | -1,0464 |
| 11715917_a_at | CD44      | CD44 molecule (Indian blood group)                   | NM_000610 /// ↑ | 0,0447 | 1,9272 | 0,0486 | 1,9738 | 0,9949 | 1,0242  |
| 11737066_x_at | GCSAML    | germinal center-associated, signaling and motility   | NM_145278       | 0,0387 | 1,9268 | 0,0384 | 2,0555 | 0,9906 | 1,0668  |
| 11751951_a_at | TJP2      | tight junction protein 2                             | NM_001170414    | 0,0212 | 1,9264 | 0,0231 | 2,0124 | 0,9906 | 1,0447  |
| 11757933_s_at | BTG2      | BTG family, member 2                                 | NM_006763       | 0,0399 | 1,9256 | 0,0400 | 2,0472 | 0,9906 | 1,0631  |
| 11754319_at   | SSH1      | slingshot protein phosphatase 1                      | NM_001161330    | 0,0401 | 1,9189 | 0,0404 | 2,0283 | 0,9906 | 1,0570  |
| 11751905_a_at | NID1      | nidogen 1                                            | NM_002508       | 0,0251 | 1,9174 | 0,0242 | 2,3567 | 0,9906 | 1,2291  |
| 11738036_s_at | APLP2     | amyloid beta (A4) precursor-like protein 2           | NM_001142276    | 0,0288 | 1,9171 | 0,0334 | 1,9856 | 0,9906 | 1,0357  |
| 11716826_a_at | FMOD      | fibromodulin                                         | NM_002023       | 0,0346 | 1,9134 | 0,0242 | 3,7094 | 0,9906 | 1,9386  |
| 11758924_x_at | LOC10012  | uncharacterized LOC100129518 /// superoxide dis      | NM_000636 /// ↑ | 0,0447 | 1,9103 | 0,0494 | 1,9288 | 0,9984 | 1,0097  |
| 11724410_x_at | MARCH2    | membrane-associated ring finger (C3HC4) 2, E3        | NM_001005415    | 0,0220 | 1,9079 | 0,0252 | 1,8869 | 0,9937 | -1,0111 |
| 11724448_a_at | DNMBP     | dynamamin binding protein                            | NM_015221       | 0,0353 | 1,9079 | 0,0375 | 1,9890 | 0,9906 | 1,0425  |
| 11718100_s_at | CD59      | CD59 molecule, complement regulatory protein         | NM_000611 /// ↑ | 0,0269 | 1,9017 | 0,0334 | 1,8409 | 0,9906 | -1,0330 |
| 11719029_at   | PIK3AP1   | phosphoinositide-3-kinase adaptor protein 1          | NM_152309       | 0,0357 | 1,8995 | 0,0375 | 1,9773 | 0,9906 | 1,0410  |
| 11743469_a_at | WDFY3     | WD repeat and FYVE domain containing 3               | NM_014991 /// ↑ | 0,0258 | 1,8977 | 0,0286 | 1,9103 | 0,9964 | 1,0067  |
| 11717937_at   | SMIM3     | small integral membrane protein 3                    | NM_032947       | 0,0324 | 1,8954 | 0,0411 | 1,7650 | 0,9906 | -1,0739 |
| 11736539_x_at | RAB7L1    | RAB7, member RAS oncogene family-like 1              | NM_001135662    | 0,0255 | 1,8951 | 0,0269 | 2,0940 | 0,9906 | 1,1050  |
| 11759022_s_at | ELK3      | ELK3, ETS-domain protein (SRF accessory protein)     | NM_005230       | 0,0269 | 1,8951 | 0,0269 | 2,1142 | 0,9906 | 1,1156  |
| 11726019_at   | EEDP1     | endonuclease/exonuclease/phosphatase family d        | NM_030636       | 0,0212 | 1,8926 | 0,0231 | 2,0108 | 0,9906 | 1,0624  |
| 11715615_at   | BTG2      | BTG family, member 2                                 | NM_006763       | 0,0214 | 1,8923 | 0,0242 | 2,0144 | 0,9906 | 1,0646  |
| 11726464_a_at | IGFLR1    | IGF-like family receptor 1                           | NM_024660       | 0,0251 | 1,8907 | 0,0269 | 1,9583 | 0,9906 | 1,0357  |
| 11754496_x_at | FMO1      | flavin containing monooxygenase 1                    | NM_002021       | 0,0497 | 1,8904 | 0,0391 | 2,4393 | 0,9906 | 1,2904  |
| 11746893_a_at | MPP1      | membrane protein, palmitoylated 1, 55kDa             | NM_001166460    | 0,0485 | 1,8894 | 0,0464 | 2,1186 | 0,9906 | 1,1213  |

|               |          |                                                        |                  |        |        |        |        |        |         |
|---------------|----------|--------------------------------------------------------|------------------|--------|--------|--------|--------|--------|---------|
| 11723868_a_at | SYNJ1    | synaptojanin 1                                         | NM_001160302     | 0,0314 | 1,8885 | 0,0324 | 2,1114 | 0,9906 | 1,1181  |
| 11729747_a_at | IL10RA   | interleukin 10 receptor, alpha                         | NM_001558 /// †  | 0,0212 | 1,8857 | 0,0231 | 1,8908 | 0,9962 | 1,0027  |
| 11746894_x_at | MPP1     | membrane protein, palmitoylated 1, 55kDa               | NM_001166460     | 0,0266 | 1,8857 | 0,0269 | 2,1131 | 0,9906 | 1,1206  |
| 11740300_x_at | MARCH2   | membrane-associated ring finger (C3HC4) 2, E3          | NM_001005415     | 0,0346 | 1,8765 | 0,0368 | 1,9543 | 0,9906 | 1,0415  |
| 11730719_x_at | AP1S2    | adaptor-related protein complex 1, sigma 2 subun       | NM_001272071     | 0,0316 | 1,8754 | 0,0448 | 1,6605 | 0,9906 | -1,1294 |
| 11751618_x_at | HLA-E    | major histocompatibility complex, class I, E           | NM_005516        | 0,0346 | 1,8730 | 0,0359 | 1,9986 | 0,9906 | 1,0671  |
| 11718905_x_at | FILIP1L  | filamin A interacting protein 1-like                   | NM_001042459     | 0,0458 | 1,8706 | 0,0480 | 1,9900 | 0,9906 | 1,0638  |
| 11756395_s_at | AP1S2    | adaptor-related protein complex 1, sigma 2 subun       | NM_001272071     | 0,0248 | 1,8702 | 0,0269 | 1,8372 | 0,9915 | -1,0180 |
| 11741550_a_at | OSBPL6   | oxysterol binding protein-like 6                       | NM_001201480     | 0,0451 | 1,8691 | 0,0387 | 2,2492 | 0,9906 | 1,2033  |
| 11721588_at   | TRAF1    | TNF receptor-associated factor 1                       | NM_001190945     | 0,0388 | 1,8625 | 0,0359 | 2,0991 | 0,9906 | 1,1270  |
| 11715916_a_at | CD44     | CD44 molecule (Indian blood group)                     | NM_000610 /// †  | 0,0269 | 1,8571 | 0,0327 | 1,8010 | 0,9906 | -1,0312 |
| 11721993_at   | SLC6A6   | solute carrier family 6 (neurotransmitter transporte   | NM_001134367     | 0,0388 | 1,8554 | 0,0494 | 1,7243 | 0,9906 | -1,0761 |
| 11724771_x_at | FCGR2A   | Fc fragment of IgG, low affinity IIa, receptor (CD32   | NM_001136219     | 0,0427 | 1,8537 | 0,0485 | 1,8443 | 0,9996 | -1,0051 |
| 11756245_s_at | ANXA5    | annexin A5                                             | NM_0011154       | 0,0251 | 1,8473 | 0,0269 | 1,8966 | 0,9906 | 1,0267  |
| 11727994_at   | STX11    | syntaxin 11                                            | NM_003764        | 0,0297 | 1,8444 | 0,0369 | 1,7644 | 0,9906 | -1,0454 |
| 11750740_a_at | ST3GAL5  | ST3 beta-galactoside alpha-2,3-sialyltransferase 5     | NM_001042437     | 0,0212 | 1,8409 | 0,0231 | 1,8931 | 0,9906 | 1,0284  |
| 11718255_at   | ABHD4    | abhydrolase domain containing 4                        | NM_022060        | 0,0220 | 1,8397 | 0,0269 | 1,7740 | 0,9906 | -1,0370 |
| 11723562_a_at | VWA5A    | von Willebrand factor A domain containing 5A           | NM_001130142     | 0,0449 | 1,8331 | 0,0461 | 1,9465 | 0,9906 | 1,0619  |
| 11756712_a_at | ACP2     | acid phosphatase 2, lysosomal                          | NM_001131064     | 0,0269 | 1,8329 | 0,0320 | 1,8320 | 0,9999 | -1,0005 |
| 11722548_at   | HIVEP1   | human immunodeficiency virus type I enhancer b         | NM_002114        | 0,0219 | 1,8326 | 0,0269 | 1,6816 | 0,9906 | -1,0898 |
| 11737748_a_at | GMFB     | glia maturation factor, beta                           | NM_004124        | 0,0269 | 1,8318 | 0,0334 | 1,7659 | 0,9906 | -1,0373 |
| 11732415_s_at | TIAM1    | T-cell lymphoma invasion and metastasis 1              | NM_003253        | 0,0456 | 1,8266 | 0,0377 | 2,2482 | 0,9906 | 1,2309  |
| 11741449_s_at | CD99     | CD99 molecule                                          | NM_001122898     | 0,0342 | 1,8250 | 0,0359 | 1,9113 | 0,9906 | 1,0473  |
| 11741086_x_at | APLP2    | amyloid beta (A4) precursor-like protein 2             | NM_001142276     | 0,0292 | 1,8225 | 0,0308 | 2,0019 | 0,9906 | 1,0985  |
| 11727415_at   | CLN8     | ceroid-lipofuscinosis, neuronal 8 (epilepsy, progr     | NM_001034061     | 0,0314 | 1,8224 | 0,0359 | 1,8249 | 0,9997 | 1,0014  |
| 11716717_a_at | NINJ1    | ninjurin 1                                             | NM_004148        | 0,0357 | 1,8210 | 0,0447 | 1,7211 | 0,9906 | -1,0580 |
| 11728287_at   | RHOQ     | ras homolog family member Q                            | NM_012249        | 0,0442 | 1,8161 | 0,0456 | 1,9023 | 0,9906 | 1,0475  |
| 11728391_s_at | LRP12    | low density lipoprotein receptor-related protein 12    | NM_001135703     | 0,0214 | 1,8133 | 0,0262 | 1,7271 | 0,9906 | -1,0499 |
| 11748401_x_at | TPM4     | tropomyosin 4                                          | NM_001145160     | 0,0324 | 1,8127 | 0,0422 | 1,6802 | 0,9906 | -1,0789 |
| 11757872_s_at | PLSCR1   | phospholipid scramblase 1                              | NM_021105        | 0,0436 | 1,8122 | 0,0447 | 1,9068 | 0,9906 | 1,0522  |
| 11730788_a_at | APLP2    | amyloid beta (A4) precursor-like protein 2             | NM_001142276     | 0,0288 | 1,8117 | 0,0315 | 1,9384 | 0,9906 | 1,0700  |
| 11715858_s_at | NCKAP1   | NCK-associated protein 1                               | NM_013436 /// †  | 0,0391 | 1,8034 | 0,0447 | 1,7806 | 0,9951 | -1,0128 |
| 11717837_x_at | AIF1     | allograft inflammatory factor 1                        | NM_0011623 /// † | 0,0447 | 1,8033 | 0,0395 | 2,0784 | 0,9906 | 1,1525  |
| 11749517_x_at | EHD1     | EH-domain containing 1                                 | NM_006795        | 0,0255 | 1,7972 | 0,0274 | 1,8141 | 0,9949 | 1,0094  |
| 11716071_s_at | PIM3     | pim-3 oncogene                                         | NM_001001852     | 0,0456 | 1,7963 | 0,0400 | 2,1036 | 0,9906 | 1,1711  |
| 11720300_a_at | SLA      | Src-like-adaptor                                       | NM_001045556     | 0,0434 | 1,7868 | 0,0444 | 1,8986 | 0,9906 | 1,0626  |
| 11723195_x_at | HLA-E    | major histocompatibility complex, class I, E           | NM_005516        | 0,0285 | 1,7850 | 0,0313 | 1,8952 | 0,9906 | 1,0617  |
| 11720302_a_at | SLA      | Src-like-adaptor                                       | NM_001045556     | 0,0449 | 1,7830 | 0,0438 | 1,9566 | 0,9906 | 1,0974  |
| 11745504_a_at | MPP1     | membrane protein, palmitoylated 1, 55kDa               | NM_001166460     | 0,0439 | 1,7735 | 0,0380 | 2,0667 | 0,9906 | 1,1653  |
| 11746543_a_at | SNX9     | sorting nexin 9                                        | NM_016224        | 0,0447 | 1,7676 | 0,0489 | 1,8031 | 0,9949 | 1,0201  |
| 11723863_a_at | DOCK10   | dedicator of cytokinesis 10                            | NM_014689 /// †  | 0,0391 | 1,7628 | 0,0447 | 1,7402 | 0,9951 | -1,0130 |
| 11728532_at   | FCER1A   | Fc fragment of IgE, high affinity I, receptor for; alp | NM_002001        | 0,0255 | 1,7596 | 0,0274 | 1,7952 | 0,9910 | 1,0202  |
| 11726218_a_at | PRDM1    | PR domain containing 1, with ZNF domain                | NM_001198 /// †  | 0,0337 | 1,7593 | 0,0377 | 1,7543 | 0,9997 | -1,0028 |
| 11728617_at   | CARD6    | caspase recruitment domain family, member 6            | NM_032587        | 0,0346 | 1,7578 | 0,0340 | 1,9379 | 0,9906 | 1,1025  |
| 11732132_a_at | IDS      | iduronate 2-sulfatase                                  | NM_000202 /// †  | 0,0293 | 1,7529 | 0,0351 | 1,7324 | 0,9949 | -1,0119 |
| 11757843_s_at | PEA15    | phosphoprotein enriched in astrocytes 15               | NM_003768        | 0,0212 | 1,7517 | 0,0231 | 1,7686 | 0,9910 | 1,0097  |
| 11716072_s_at | ATP6V1B2 | ATPase, H+ transporting, lysosomal 56/58kDa, V1        | NM_001693        | 0,0320 | 1,7481 | 0,0375 | 1,7205 | 0,9940 | -1,0161 |
| 11754318_at   | SSH1     | slingshot protein phosphatase 1                        | NM_001161330     | 0,0302 | 1,7478 | 0,0334 | 1,8429 | 0,9906 | 1,0544  |
| 11720864_s_at | SLC25A24 | solute carrier family 25 (mitochondrial carrier; pho   | NM_013386 /// †  | 0,0424 | 1,7473 | 0,0463 | 1,7634 | 0,9965 | 1,0092  |
| 11740974_a_at | CYFIP1   | cytoplasmic FMR1 interacting protein 1                 | NM_001033028     | 0,0285 | 1,7466 | 0,0436 | 1,5348 | 0,9906 | -1,1380 |
| 11725327_a_at | CAMK2D   | calcium/calmodulin-dependent protein kinase II de      | NM_0011221 /// † | 0,0258 | 1,7426 | 0,0269 | 1,9065 | 0,9906 | 1,0941  |
| 11732084_a_at | TFEC     | transcription factor EC                                | NM_001018058     | 0,0365 | 1,7422 | 0,0364 | 1,8620 | 0,9906 | 1,0687  |
| 11727412_a_at | CLN8     | ceroid-lipofuscinosis, neuronal 8 (epilepsy, progr     | NM_001034061     | 0,0419 | 1,7421 | 0,0471 | 1,7377 | 0,9997 | -1,0025 |
| 11736550_x_at | RAB7L1   | RAB7, member RAS oncogene family-like 1                | NM_001135662     | 0,0451 | 1,7417 | 0,0491 | 1,7881 | 0,9923 | 1,0267  |
| 11748400_s_at | TPM4     | tropomyosin 4                                          | NM_001145160     | 0,0313 | 1,7411 | 0,0400 | 1,6321 | 0,9906 | -1,0668 |
| 11722558_x_at | MPP1     | membrane protein, palmitoylated 1, 55kDa               | NM_001166460     | 0,0345 | 1,7370 | 0,0338 | 1,9299 | 0,9906 | 1,1111  |
| 11731183_a_at | TFPI     | tissue factor pathway inhibitor (lipoprotein-associa   | NM_001032281     | 0,0345 | 1,7352 | 0,0481 | 1,5753 | 0,9906 | -1,1015 |
| 11755046_a_at | SPHK1    | sphingosine kinase 1                                   | NM_001142601     | 0,0362 | 1,7289 | 0,0461 | 1,6223 | 0,9906 | -1,0657 |
| 11722152_s_at | EIF2AK3  | eukaryotic translation initiation factor 2-alpha kina  | NM_004836        | 0,0405 | 1,7249 | 0,0320 | 2,2462 | 0,9906 | 1,3022  |
| 11725364_x_at | GAS7     | growth arrest-specific 7                               | NM_001130831     | 0,0345 | 1,7248 | 0,0447 | 1,6193 | 0,9906 | -1,0652 |
| 11736315_s_at | WBP5     | WW domain binding protein 5                            | NM_001006612     | 0,0442 | 1,7244 | 0,0447 | 1,8184 | 0,9906 | 1,0545  |
| 11743458_a_at | FAM49A   | family with sequence similarity 49, member A           | NM_030797        | 0,0267 | 1,7224 | 0,0338 | 1,6053 | 0,9906 | -1,0730 |
| 11716135_a_at | MVP      | major vault protein                                    | NM_005115 /// †  | 0,0438 | 1,7221 | 0,0447 | 1,8031 | 0,9906 | 1,0470  |
| 11720367_a_at | TMEM2    | transmembrane protein 2                                | NM_001135820     | 0,0451 | 1,7211 | 0,0387 | 2,0173 | 0,9906 | 1,1721  |
| 11743010_at   | NFIL3    | nuclear factor, interleukin 3 regulated                | NM_005384        | 0,0363 | 1,7196 | 0,0444 | 1,6527 | 0,9906 | -1,0405 |
| 11733187_a_at | IL7R     | interleukin 7 receptor                                 | NM_002185        | 0,0402 | 1,7193 | 0,0411 | 1,7887 | 0,9906 | 1,0404  |

|               |           |                                                                    |                 |        |        |        |        |        |         |
|---------------|-----------|--------------------------------------------------------------------|-----------------|--------|--------|--------|--------|--------|---------|
| 11758676_s_at | RHOQ      | ras homolog family member Q                                        | NM_012249       | 0,0251 | 1,7131 | 0,0334 | 1,5389 | 0,9906 | -1,1132 |
| 11715584_a_at | CAV1      | caveolin 1, caveolae protein, 22kDa                                | NM_001172895    | 0,0337 | 1,7127 | 0,0269 | 2,2751 | 0,9906 | 1,3283  |
| 11749802_a_at | ARL8B     | ADP-ribosylation factor-like 8B                                    | NM_018184       | 0,0251 | 1,7125 | 0,0306 | 1,5850 | 0,9906 | -1,0804 |
| 11747808_a_at | WIP1      | WD repeat domain, phosphoinositide interacting 1                   | NM_017983       | 0,0399 | 1,7110 | 0,0463 | 1,6673 | 0,9916 | -1,0262 |
| 11756436_x_at | C1orf85   | chromosome 1 open reading frame 85                                 | NM_001256604    | 0,0325 | 1,7094 | 0,0359 | 1,7403 | 0,9923 | 1,0181  |
| 11722542_a_at | HIVEP2    | human immunodeficiency virus type I enhancer binding protein 2     | NM_006734       | 0,0269 | 1,7094 | 0,0351 | 1,5742 | 0,9906 | -1,0859 |
| 11718137_a_at | PDXK      | pyridoxal (pyridoxine, vitamin B6) kinase                          | NM_003681 /// ↑ | 0,0436 | 1,7087 | 0,0500 | 1,6862 | 0,9951 | -1,0134 |
| 11717413_a_at | WIP1      | WD repeat domain, phosphoinositide interacting 1                   | NM_017983       | 0,0281 | 1,7058 | 0,0342 | 1,6700 | 0,9910 | -1,0215 |
| 11744054_a_at | ZNF1      | zinc finger, NFX1-type containing 1                                | NM_021035       | 0,0251 | 1,7039 | 0,0269 | 1,7460 | 0,9906 | 1,0247  |
| 11719638_a_at | NEK3      | NIMA-related kinase 3                                              | NM_001146099    | 0,0456 | 1,6997 | 0,0338 | 2,2813 | 0,9906 | 1,3422  |
| 11723187_at   | FGD6      | FYVE, RhoGEF and PH domain containing 6                            | NM_018351       | 0,0269 | 1,6968 | 0,0286 | 1,7594 | 0,9906 | 1,0369  |
| 11727007_at   | SORT1     | sortilin 1                                                         | NM_001205228    | 0,0428 | 1,6963 | 0,0395 | 1,8725 | 0,9906 | 1,1039  |
| 11757793_s_at | TFPI      | tissue factor pathway inhibitor (lipoprotein-association factor 1) | NM_001032281    | 0,0267 | 1,6953 | 0,0352 | 1,5411 | 0,9906 | -1,1001 |
| 11725452_at   | MCUR1     | mitochondrial calcium uniporter regulator 1                        | NM_001031713    | 0,0427 | 1,6877 | 0,0306 | 2,3501 | 0,9906 | 1,3925  |
| 11758830_at   | SLA       | Src-like-adaptor                                                   | NM_001045556    | 0,0488 | 1,6819 | 0,0494 | 1,7839 | 0,9906 | 1,0606  |
| 11723563_at   | VWA5A     | von Willebrand factor A domain containing 5A                       | NM_001130142    | 0,0348 | 1,6782 | 0,0377 | 1,7104 | 0,9923 | 1,0192  |
| 11720208_a_at | IRF9      | interferon regulatory factor 9                                     | NM_006084       | 0,0493 | 1,6781 | 0,0491 | 1,8056 | 0,9906 | 1,0760  |
| 11718641_a_at | NDST2     | N-deacetylase/N-sulfotransferase (heparan glucosaminase 2)         | NM_003635       | 0,0449 | 1,6729 | 0,0422 | 1,8436 | 0,9906 | 1,1021  |
| 11748563_s_at | REEP5     | receptor accessory protein 5                                       | NM_005669       | 0,0341 | 1,6726 | 0,0404 | 1,6238 | 0,9906 | -1,0300 |
| 11757515_s_at | ITGAV     | integrin, alpha V                                                  | NM_001144999    | 0,0337 | 1,6725 | 0,0377 | 1,6700 | 0,9997 | -1,0015 |
| 11729063_a_at | PDGFA     | platelet-derived growth factor alpha polypeptide                   | NM_002607 /// ↑ | 0,0399 | 1,6670 | 0,0424 | 1,7013 | 0,9923 | 1,0206  |
| 11716041_a_at | PPP2CB    | protein phosphatase 2, catalytic subunit, beta isoform             | NM_001009552    | 0,0365 | 1,6664 | 0,0467 | 1,5677 | 0,9906 | -1,0630 |
| 11716097_a_at | RAP1A     | RAP1A, member of RAS oncogene family                               | NM_001010935    | 0,0443 | 1,6586 | 0,0442 | 1,7720 | 0,9906 | 1,0683  |
| 11749803_s_at | ARL8B     | ADP-ribosylation factor-like 8B                                    | NM_018184       | 0,0346 | 1,6548 | 0,0408 | 1,6210 | 0,9916 | -1,0209 |
| 11756358_a_at | PLK3      | polo-like kinase 3                                                 | NM_004073       | 0,0312 | 1,6528 | 0,0334 | 1,7525 | 0,9906 | 1,0604  |
| 11758506_s_at | RNF13     | ring finger protein 13                                             | NM_007282 /// ↑ | 0,0258 | 1,6510 | 0,0302 | 1,6068 | 0,9906 | -1,0275 |
| 11722298_a_at | RAB7L1    | RAB7, member RAS oncogene family-like 1                            | NM_001135662    | 0,0292 | 1,6499 | 0,0342 | 1,6511 | 0,9997 | 1,0007  |
| 11752620_s_at | YPEL5     | yippee-like 5 (Drosophila)                                         | NM_001127399    | 0,0212 | 1,6479 | 0,0231 | 1,6471 | 0,9997 | -1,0005 |
| 11722379_at   | GNG11     | guanine nucleotide binding protein (G protein), gamma 11           | NM_004126       | 0,0324 | 1,6465 | 0,0338 | 1,7511 | 0,9906 | 1,0635  |
| 11733644_s_at | NECAP2    | NECAP endocytosis associated 2                                     | NM_001145277    | 0,0449 | 1,6443 | 0,0448 | 1,7495 | 0,9906 | 1,0640  |
| 11757578_x_at | RHOC      | ras homolog family member C                                        | NM_001042678    | 0,0277 | 1,6369 | 0,0376 | 1,5122 | 0,9906 | -1,0824 |
| 11743036_s_at | SAT1      | spermidine/spermine N1-acetyltransferase 1                         | NM_002970 /// ↑ | 0,0265 | 1,6316 | 0,0297 | 1,6181 | 0,9949 | -1,0084 |
| 11757839_s_at | NECAP2    | NECAP endocytosis associated 2                                     | NM_001145277    | 0,0212 | 1,6303 | 0,0231 | 1,6510 | 0,9906 | 1,0127  |
| 11749978_a_at | MVP       | major vault protein                                                | NM_005115 /// ↑ | 0,0450 | 1,6280 | 0,0456 | 1,7205 | 0,9906 | 1,0568  |
| 11735429_x_at | RNF135    | ring finger protein 135                                            | NM_001184992    | 0,0269 | 1,6243 | 0,0313 | 1,6064 | 0,9940 | -1,0111 |
| 11748957_x_at | CORO1C    | coronin, actin binding protein, 1C                                 | NM_001105237    | 0,0214 | 1,6242 | 0,0242 | 1,6234 | 0,9997 | -1,0005 |
| 11755603_a_at | ARL8B     | ADP-ribosylation factor-like 8B                                    | NM_018184       | 0,0281 | 1,6215 | 0,0351 | 1,5721 | 0,9906 | -1,0314 |
| 11756303_a_at | SH3TC1    | SH3 domain and tetratricopeptide repeats 1                         | NM_018986       | 0,0366 | 1,6205 | 0,0395 | 1,6362 | 0,9952 | 1,0097  |
| 11757894_x_at | NFKBIA    | nuclear factor of kappa light polypeptide gene enhancer 1, alpha   | NM_020529       | 0,0497 | 1,6201 | 0,0447 | 1,8360 | 0,9906 | 1,1333  |
| 11722031_s_at | RNF11     | ring finger protein 11                                             | NM_014372       | 0,0281 | 1,6174 | 0,0327 | 1,6577 | 0,9906 | 1,0249  |
| 11757513_at   | NFKBIZ    | nuclear factor of kappa light polypeptide gene enhancer 1, zeta    | NM_001005474    | 0,0365 | 1,6129 | 0,0334 | 1,8407 | 0,9906 | 1,1412  |
| 11723951_a_at | TFPI      | tissue factor pathway inhibitor (lipoprotein-association factor 1) | NM_001032281    | 0,0332 | 1,6086 | 0,0394 | 1,5638 | 0,9906 | -1,0286 |
| 11716042_x_at | PPP2CB    | protein phosphatase 2, catalytic subunit, beta isoform             | NM_001009552    | 0,0269 | 1,6073 | 0,0327 | 1,5778 | 0,9910 | -1,0187 |
| 11744538_a_at | CALHM2    | calcium homeostasis modulator 2                                    | NM_015916 /// ↑ | 0,0251 | 1,6060 | 0,0297 | 1,5345 | 0,9906 | -1,0466 |
| 11715432_a_at | TMBIM1    | transmembrane BAX inhibitor motif containing 1                     | NM_022152       | 0,0308 | 1,6026 | 0,0384 | 1,5339 | 0,9906 | -1,0448 |
| 11722141_at   | RELB      | v-rel reticuloendotheliosis viral oncogene homolog B               | NM_006509       | 0,0214 | 1,5999 | 0,0231 | 1,6923 | 0,9906 | 1,0578  |
| 11731574_at   | FRMD4B    | FERM domain containing 4B                                          | NM_015123       | 0,0388 | 1,5981 | 0,0388 | 1,6623 | 0,9906 | 1,0401  |
| 11754587_a_at | FYN       | FYN oncogene related to SRC, FGR, YES                              | NM_001242779    | 0,0250 | 1,5979 | 0,0269 | 1,6202 | 0,9910 | 1,0140  |
| 11743962_at   | CNST      | consortin, connexin sorting protein                                | NM_001139459    | 0,0423 | 1,5951 | 0,0424 | 1,6730 | 0,9906 | 1,0489  |
| 11727920_a_at | OSTF1     | osteoclast stimulating factor 1                                    | NM_012383       | 0,0363 | 1,5945 | 0,0403 | 1,5909 | 0,9997 | -1,0023 |
| 11739711_a_at | PHACTR2   | phosphatase and actin regulator 2                                  | NM_001100164    | 0,0493 | 1,5919 | 0,0475 | 1,7268 | 0,9906 | 1,0848  |
| 11732905_a_at | CABLES1   | Cdk5 and Abl enzyme substrate 1                                    | NM_001100619    | 0,0212 | 1,5914 | 0,0231 | 1,6342 | 0,9906 | 1,0269  |
| 11744000_a_at | NFKBIA    | nuclear factor of kappa light polypeptide gene enhancer 1, alpha   | NM_020529       | 0,0320 | 1,5887 | 0,0300 | 1,8169 | 0,9906 | 1,1437  |
| 11759092_at   | USP12     | ubiquitin specific peptidase 12                                    | NM_182488       | 0,0212 | 1,5878 | 0,0231 | 1,6525 | 0,9906 | 1,0407  |
| 11716302_s_at | ACSL1     | acyl-CoA synthetase long-chain family member 1                     | NM_0011995      | 0,0250 | 1,5858 | 0,0286 | 1,5273 | 0,9906 | -1,0383 |
| 11744698_x_at | TPRG1L    | tumor protein p63 regulated 1-like                                 | NM_182752       | 0,0447 | 1,5831 | 0,0470 | 1,6341 | 0,9906 | 1,0322  |
| 11722602_at   | PLEKHF1   | pleckstrin homology domain containing, family F (1)                | NM_024310       | 0,0324 | 1,5831 | 0,0395 | 1,5283 | 0,9906 | -1,0358 |
| 11728733_at   | ZBTB38    | zinc finger and BTB domain containing 38                           | NM_001080412    | 0,0447 | 1,5803 | 0,0480 | 1,6218 | 0,9915 | 1,0263  |
| 11734317_a_at | STARD8    | StAR-related lipid transfer (START) domain containing 8            | NM_001142503    | 0,0281 | 1,5792 | 0,0348 | 1,5385 | 0,9906 | -1,0265 |
| 11723329_a_at | GSN       | gelsolin                                                           | NM_000177 /// ↑ | 0,0458 | 1,5707 | 0,0390 | 1,8025 | 0,9906 | 1,1476  |
| 11723910_a_at | CMKLR1    | chemokine-like receptor 1                                          | NM_001142343    | 0,0425 | 1,5656 | 0,0359 | 1,8111 | 0,9906 | 1,1569  |
| 11754845_a_at | FAM109A   | family with sequence similarity 109, member A                      | NM_001177996    | 0,0413 | 1,5644 | 0,0395 | 1,6701 | 0,9906 | 1,0676  |
| 11718600_a_at | TM2D2     | TM2 domain containing 2                                            | NM_001024380    | 0,0258 | 1,5635 | 0,0289 | 1,5585 | 0,9989 | -1,0032 |
| 11717409_at   | SH2B3     | SH2B adaptor protein 3                                             | NM_005475       | 0,0456 | 1,5634 | 0,0492 | 1,6032 | 0,9916 | 1,0255  |
| 11716452_a_at | MYO1C     | myosin IC                                                          | NM_001080779    | 0,0237 | 1,5628 | 0,0269 | 1,5746 | 0,9949 | 1,0076  |
| 11720252_s_at | C20orf194 | chromosome 20 open reading frame 194                               | NM_001009984    | 0,0325 | 1,5597 | 0,0340 | 1,6310 | 0,9906 | 1,0457  |



|               |            |                                                           |                 |        |         |        |         |        |         |
|---------------|------------|-----------------------------------------------------------|-----------------|--------|---------|--------|---------|--------|---------|
| 11742923_a_at | LAPTM5     | lysosomal protein transmembrane 5                         | NM_006762       | 0,0357 | 1,5590  | 0,0408 | 1,5464  | 0,9953 | -1,0082 |
| 11721499_x_at | CTSA       | cathepsin A                                               | NM_000308 /// ↑ | 0,0369 | 1,5588  | 0,0375 | 1,6224  | 0,9906 | 1,0408  |
| 11720859_s_at | ABHD3      | abhydrolase domain containing 3                           | NM_138340       | 0,0341 | 1,5538  | 0,0412 | 1,5020  | 0,9906 | -1,0345 |
| 11724172_s_at | FCHO2      | FCH domain only 2                                         | NM_001146032    | 0,0403 | 1,5499  | 0,0375 | 1,6819  | 0,9906 | 1,0852  |
| 11716759_a_at | CASP4      | caspase 4, apoptosis-related cysteine peptidase           | NM_001225 /// ↑ | 0,0272 | 1,5475  | 0,0338 | 1,5204  | 0,9910 | -1,0178 |
| 11756762_x_at | C1orf85    | chromosome 1 open reading frame 85                        | NM_001256604    | 0,0314 | 1,5362  | 0,0338 | 1,6048  | 0,9906 | 1,0446  |
| 11754440_s_at | GAS6       | growth arrest-specific 6                                  | NM_000820 /// ↑ | 0,0473 | 1,5293  | 0,0467 | 1,6301  | 0,9906 | 1,0659  |
| 11719398_s_at | RRAGC      | Ras-related GTP binding C                                 | NM_001271851    | 0,0281 | 1,5180  | 0,0336 | 1,5190  | 0,9997 | 1,0007  |
| 11749662_a_at | KIFC3      | kinesin family member C3                                  | NM_001130099    | 0,0374 | 1,5174  | 0,0411 | 1,5189  | 0,9997 | 1,0010  |
| 11718896_x_at | SPAG9      | sperm associated antigen 9                                | NM_001130527    | 0,0406 | 1,5140  | 0,0408 | 1,5757  | 0,9906 | 1,0408  |
| 11729998_a_at | B3GNT7     | UDP-GlcNAc:betaGal beta-1,3-N-acetylglucosamin            | NM_145236       | 0,0420 | 1,5127  | 0,0380 | 1,6479  | 0,9906 | 1,0894  |
| 11738552_x_at | ANXA2      | annexin A2                                                | NM_001002857    | 0,0269 | 1,5097  | 0,0306 | 1,5343  | 0,9910 | 1,0163  |
| 11742922_at   | LAPTM5     | lysosomal protein transmembrane 5                         | NM_006762       | 0,0427 | 1,5041  | 0,0447 | 1,5476  | 0,9906 | 1,0289  |
| 11724326_a_at | ARHGAP2    | Rho GTPase activating protein 25                          | NM_001007231    | 0,0324 | 1,5010  | 0,0338 | 1,5709  | 0,9906 | 1,0465  |
| 11717589_a_at | EXOSC8     | exosome component 8                                       | NM_181503       | 0,0419 | -1,5100 | 0,0457 | -1,5229 | 0,9953 | -1,0085 |
| 11718338_a_at | NHP2       | NHP2 ribonucleoprotein                                    | NM_001034833    | 0,0402 | -1,5117 | 0,0447 | -1,5187 | 0,9991 | -1,0047 |
| 11744098_at   | NOP58      | NOP58 ribonucleoprotein                                   | NM_015934       | 0,0212 | -1,5131 | 0,0231 | -1,5125 | 0,9997 | 1,0004  |
| 11733446_at   | MMS22L     | MMS22-like, DNA repair protein                            | NM_198468       | 0,0438 | -1,5153 | 0,0388 | -1,6696 | 0,9906 | -1,1018 |
| 11715698_a_at | NOLC1      | nucleolar and coiled-body phosphoprotein 1                | NM_004741       | 0,0377 | -1,5211 | 0,0372 | -1,6033 | 0,9906 | -1,0541 |
| 11725715_x_at | RPS14      | ribosomal protein S14                                     | NM_001025070    | 0,0346 | -1,5223 | 0,0366 | -1,5711 | 0,9906 | -1,0320 |
| 11720970_at   | TOP2A      | topoisomerase (DNA) II alpha 170kDa                       | NM_001067       | 0,0376 | -1,5241 | 0,0438 | -1,5044 | 0,9949 | 1,0130  |
| 11732520_a_at | RAD51C     | RAD51 homolog C (S. cerevisiae)                           | NM_002876 /// ↑ | 0,0337 | -1,5258 | 0,0370 | -1,5377 | 0,9952 | -1,0078 |
| 11756156_s_at | TFRC       | transferrin receptor (p90, CD71)                          | NM_001128148    | 0,0267 | -1,5280 | 0,0277 | -1,5819 | 0,9906 | -1,0353 |
| 11739085_a_at | PCID2      | PCI domain containing 2                                   | NM_001127202    | 0,0421 | -1,5289 | 0,0491 | -1,5045 | 0,9937 | 1,0163  |
| 11729967_a_at | CLYBL      | citrate lyase beta like                                   | NM_138280 /// ↑ | 0,0332 | -1,5337 | 0,0313 | -1,7192 | 0,9906 | -1,1209 |
| 11727353_a_at | CENPM      | centromere protein M                                      | NM_001002876    | 0,0387 | -1,5363 | 0,0447 | -1,5075 | 0,9919 | 1,0192  |
| 11727789_a_at | USP1       | ubiquitin specific peptidase 1                            | NM_001017415    | 0,0346 | -1,5370 | 0,0359 | -1,5974 | 0,9906 | -1,0393 |
| 11753942_a_at | UCA1       | urothelial cancer associated 1 (non-protein coding        | NR_015379       | 0,0411 | -1,5371 | 0,0474 | -1,5176 | 0,9949 | 1,0128  |
| 11754822_x_at | TDP1       | tyrosyl-DNA phosphodiesterase 1                           | NM_001008744    | 0,0269 | -1,5397 | 0,0289 | -1,5901 | 0,9906 | -1,0327 |
| 11743468_at   | DKC1 /// M | dyskeratosis congenita 1, dyskerin /// microRNA 6         | NM_001142463    | 0,0411 | -1,5466 | 0,0483 | -1,5192 | 0,9923 | 1,0180  |
| 11744082_at   | MRPS31     | mitochondrial ribosomal protein S31                       | NM_005830       | 0,0256 | -1,5480 | 0,0300 | -1,5136 | 0,9906 | 1,0227  |
| 11752128_a_at | IARS       | isoleucyl-tRNA synthetase                                 | NM_002161 /// ↑ | 0,0289 | -1,5539 | 0,0340 | -1,5539 | 1,0000 | 1,0000  |
| 11716822_a_at | BDH2 /// S | 3-hydroxybutyrate dehydrogenase, type 2 /// solut         | NM_020139 /// ↑ | 0,0258 | -1,5550 | 0,0308 | -1,5074 | 0,9906 | 1,0316  |
| 11742239_a_at | DEPDC1B    | DEP domain containing 1B                                  | NM_001145208    | 0,0314 | -1,5563 | 0,0377 | -1,5193 | 0,9906 | 1,0244  |
| 11757725_a_at | NHP2       | NHP2 ribonucleoprotein                                    | NM_001034833    | 0,0422 | -1,5612 | 0,0458 | -1,5795 | 0,9951 | -1,0117 |
| 11720465_a_at | SKIV2L2    | superkiller viralicidic activity 2-like 2 (S. cerevisiae) | NM_015360       | 0,0408 | -1,5633 | 0,0494 | -1,5094 | 0,9906 | 1,0357  |
| 11721512_a_at | TMM21      | translocase of inner mitochondrial membrane 21 f          | NM_014177       | 0,0299 | -1,5649 | 0,0375 | -1,5070 | 0,9906 | 1,0384  |
| 11743536_at   | VRK1       | vaccinia related kinase 1                                 | NM_003384       | 0,0405 | -1,5653 | 0,0479 | -1,5334 | 0,9920 | 1,0208  |
| 11731578_s_at | ACSS1      | acyl-CoA synthetase short-chain family member 1           | NM_001252675    | 0,0276 | -1,5669 | 0,0308 | -1,6180 | 0,9906 | -1,0326 |
| 11745463_x_at | PRDX2      | peroxiredoxin 2                                           | NM_005809 /// ↑ | 0,0425 | -1,5669 | 0,0500 | -1,5313 | 0,9916 | 1,0233  |
| 11715505_a_at | IARS       | isoleucyl-tRNA synthetase                                 | NM_002161 /// ↑ | 0,0269 | -1,5723 | 0,0313 | -1,5541 | 0,9926 | 1,0117  |
| 11750569_a_at | IARS       | isoleucyl-tRNA synthetase                                 | NM_002161 /// ↑ | 0,0277 | -1,5748 | 0,0338 | -1,5426 | 0,9906 | 1,0209  |
| 11734725_a_at | PNPT1      | polyribonucleotide nucleotidyltransferase 1               | NM_033109       | 0,0337 | -1,5813 | 0,0388 | -1,5548 | 0,9923 | 1,0170  |
| 11758640_s_at | FARSB      | phenylalanyl-tRNA synthetase, beta subunit                | NM_005687       | 0,0374 | -1,5840 | 0,0447 | -1,5393 | 0,9906 | 1,0291  |
| 11750373_a_at | BRCA1      | breast cancer 1, early onset                              | NM_007294 /// ↑ | 0,0271 | -1,5850 | 0,0338 | -1,5327 | 0,9906 | 1,0341  |
| 11751966_a_at | IARS       | isoleucyl-tRNA synthetase                                 | NM_002161 /// ↑ | 0,0283 | -1,5879 | 0,0359 | -1,5318 | 0,9906 | 1,0366  |
| 11727808_s_at | FECH       | ferrochelatase                                            | NM_000140 /// ↑ | 0,0212 | -1,5889 | 0,0242 | -1,5274 | 0,9906 | 1,0403  |
| 11743519_at   | DIDO1      | death inducer-obliterator 1                               | NM_001193369    | 0,0295 | -1,5907 | 0,0371 | -1,5273 | 0,9906 | 1,0415  |
| 11743104_at   | PTCD3      | pentatricopeptide repeat domain 3                         | NM_017952       | 0,0384 | -1,5963 | 0,0488 | -1,5137 | 0,9906 | 1,0546  |
| 11726444_a_at | SAMD13     | sterile alpha motif domain containing 13                  | NM_001010971    | 0,0376 | -1,5971 | 0,0444 | -1,5652 | 0,9919 | 1,0204  |
| 11719332_at   | ARHGAP1    | Rho GTPase activating protein 15                          | NM_018460       | 0,0383 | -1,5972 | 0,0395 | -1,6378 | 0,9910 | -1,0255 |
| 11746829_x_at | DDX55      | DEAD (Asp-Glu-Ala-Asp) box polypeptide 55                 | NM_020936       | 0,0471 | -1,5973 | 0,0465 | -1,7151 | 0,9906 | -1,0737 |
| 11745447_x_at | SAC3D1     | SAC3 domain containing 1                                  | NM_013299       | 0,0267 | -1,5985 | 0,0297 | -1,6046 | 0,9985 | -1,0038 |
| 11722252_x_at | NEK2       | NIMA-related kinase 2                                     | NM_001204182    | 0,0448 | -1,5989 | 0,0494 | -1,6198 | 0,9951 | -1,0131 |
| 11756405_s_at | GCSH /// L | glycine cleavage system protein H (aminomethyl C          | NM_004483 /// ↑ | 0,0310 | -1,6071 | 0,0351 | -1,6229 | 0,9949 | -1,0098 |
| 11733701_a_at | FKBP11     | FK506 binding protein 11, 19 kDa                          | NM_001143781    | 0,0392 | -1,6075 | 0,0377 | -1,7112 | 0,9906 | -1,0645 |
| 11746542_x_at | KIAA0146   | KIAA0146 /// uncharacterized LOC100996383                 | NM_001080394    | 0,0245 | -1,6077 | 0,0273 | -1,5622 | 0,9906 | 1,0291  |
| 11725149_at   | C9orf40    | chromosome 9 open reading frame 40                        | NM_017998       | 0,0399 | -1,6081 | 0,0494 | -1,5364 | 0,9906 | 1,0467  |
| 11740366_a_at | SHMT1      | serine hydroxymethyltransferase 1 (soluble)               | NM_004169 /// ↑ | 0,0269 | -1,6085 | 0,0334 | -1,5785 | 0,9910 | 1,0190  |
| 11717511_a_at | CIRH1A     | cirrrosis, autosomal recessive 1A (cirhin)                | NM_032830       | 0,0248 | -1,6098 | 0,0289 | -1,5259 | 0,9906 | 1,0550  |
| 11755951_s_at | PRMT5      | protein arginine methyltransferase 5                      | NM_001039619    | 0,0413 | -1,6164 | 0,0447 | -1,6407 | 0,9949 | -1,0151 |
| 11743296_a_at | CENPF      | centromere protein F, 350/400kDa                          | NM_016343       | 0,0456 | -1,6180 | 0,0474 | -1,6983 | 0,9906 | -1,0496 |
| 11755600_a_at | GEMIN6     | gem (nuclear organelle) associated protein 6              | NM_024775       | 0,0283 | -1,6180 | 0,0359 | -1,5471 | 0,9906 | 1,0459  |
| 11724343_at   | ITGA4      | integrin, alpha 4 (antigen CD49D, alpha 4 subunit         | NM_000885       | 0,0439 | -1,6199 | 0,0462 | -1,6677 | 0,9910 | -1,0295 |
| 11715410_x_at | PRDX2      | peroxiredoxin 2                                           | NM_005809 /// ↑ | 0,0281 | -1,6230 | 0,0338 | -1,6044 | 0,9949 | 1,0116  |
| 11730421_x_at | FLVCR1     | feline leukemia virus subgroup C cellular receptor        | NM_014053       | 0,0302 | -1,6241 | 0,0344 | -1,6407 | 0,9949 | -1,0102 |

|               |            |                                                                     |                 |        |         |        |         |        |         |
|---------------|------------|---------------------------------------------------------------------|-----------------|--------|---------|--------|---------|--------|---------|
| 11750272_a_at | LARS       | leucyl-tRNA synthetase                                              | NM_020117       | 0,0315 | -1,6257 | 0,0384 | -1,5707 | 0,9906 | 1,0351  |
| 11718142_a_at | TTC27      | tetratricopeptide repeat domain 27                                  | NM_001193509    | 0,0248 | -1,6259 | 0,0269 | -1,6259 | 1,0000 | 1,0000  |
| 11729688_s_at | LYRM7      | LYR motif containing 7                                              | NM_181705       | 0,0384 | -1,6264 | 0,0428 | -1,6236 | 0,9997 | 1,0017  |
| 11717773_a_at | THRA       | thyroid hormone receptor, alpha                                     | NM_001190918    | 0,0357 | -1,6272 | 0,0447 | -1,5526 | 0,9906 | 1,0480  |
| 11739515_at   | CA8        | carbonic anhydrase VIII                                             | NM_004056       | 0,0387 | -1,6282 | 0,0405 | -1,6654 | 0,9916 | -1,0228 |
| 11735992_a_at | LARS       | leucyl-tRNA synthetase                                              | NM_020117       | 0,0251 | -1,6314 | 0,0297 | -1,5527 | 0,9906 | 1,0507  |
| 11736596_s_at | GIN54      | GIN5 complex subunit 4 (Sld5 homolog)                               | NM_032336       | 0,0399 | -1,6322 | 0,0494 | -1,5583 | 0,9906 | 1,0475  |
| 11756607_x_at | ZNF85      | zinc finger protein 85                                              | NM_001256171    | 0,0299 | -1,6327 | 0,0302 | -1,7975 | 0,9906 | -1,1010 |
| 11727543_at   | OIP5       | Opa interacting protein 5                                           | NM_007280       | 0,0372 | -1,6334 | 0,0388 | -1,6695 | 0,9916 | -1,0221 |
| 11726630_a_at | HTRA2      | HtrA serine peptidase 2                                             | NM_013247 /// ↑ | 0,0373 | -1,6356 | 0,0447 | -1,5794 | 0,9906 | 1,0356  |
| 11736070_at   | C8orf33    | chromosome 8 open reading frame 33                                  | NM_023080       | 0,0368 | -1,6445 | 0,0447 | -1,5853 | 0,9906 | 1,0373  |
| 11736050_s_at | FAM229B    | family with sequence similarity 229, member B                       | NM_001033564    | 0,0285 | -1,6453 | 0,0344 | -1,6164 | 0,9916 | 1,0179  |
| 11718404_at   | RFC3       | replication factor C (activator 1) 3, 38kDa                         | NM_002915 /// ↑ | 0,0266 | -1,6459 | 0,0338 | -1,5257 | 0,9906 | 1,0788  |
| 11717677_a_at | CYFIP2     | cytoplasmic FMR1 interacting protein 2                              | NM_001037332    | 0,0365 | -1,6475 | 0,0470 | -1,5484 | 0,9906 | 1,0640  |
| 11718303_a_at | PAFAH1B3   | platelet-activating factor acetylhydrolase 1b, catalytic            | NM_001145939    | 0,0332 | -1,6478 | 0,0368 | -1,6623 | 0,9952 | -1,0088 |
| 11743603_a_at | RRM1       | ribonucleotide reductase M1                                         | NM_001033       | 0,0346 | -1,6511 | 0,0408 | -1,6116 | 0,9910 | 1,0245  |
| 11745391_x_at | MRPL3      | mitochondrial ribosomal protein L3                                  | NM_007208       | 0,0387 | -1,6521 | 0,0422 | -1,6634 | 0,9980 | -1,0068 |
| 11724606_a_at | MAP2K6     | mitogen-activated protein kinase kinase 6                           | NM_002758 /// ↑ | 0,0314 | -1,6528 | 0,0376 | -1,6129 | 0,9906 | 1,0248  |
| 11735234_a_at | SLC38A5    | solute carrier family 38, member 5                                  | NM_033518       | 0,0272 | -1,6554 | 0,0269 | -1,9488 | 0,9906 | -1,1773 |
| 11747943_a_at | E2F8       | E2F transcription factor 8                                          | NM_001256371    | 0,0391 | -1,6613 | 0,0377 | -1,7750 | 0,9906 | -1,0684 |
| 11757061_s_at | GCSH /// L | glycine cleavage system protein H (aminomethyltransferase)          | NM_004483 /// ↑ | 0,0319 | -1,6618 | 0,0384 | -1,6119 | 0,9906 | 1,0310  |
| 11745979_a_at | LIG1       | ligase I, DNA, ATP-dependent                                        | NM_000234       | 0,0276 | -1,6713 | 0,0338 | -1,6241 | 0,9906 | 1,0290  |
| 11748475_a_at | TCERG1     | transcription elongation regulator 1                                | NM_001040006    | 0,0391 | -1,6714 | 0,0390 | -1,7477 | 0,9906 | -1,0457 |
| 11716388_a_at | BAZ1B      | bromodomain adjacent to zinc finger domain, 1B                      | NM_023005 /// ↑ | 0,0269 | -1,6719 | 0,0334 | -1,6296 | 0,9906 | 1,0260  |
| 11760685_x_at | BRX1       | BRX1, biogenesis of ribosomes, homolog (S. cerevisiae)              | NM_018321       | 0,0401 | -1,6726 | 0,0444 | -1,6817 | 0,9992 | -1,0054 |
| 11738457_a_at | C20orf197  | chromosome 20 open reading frame 197                                | NM_173644       | 0,0413 | -1,6742 | 0,0482 | -1,6478 | 0,9949 | 1,0161  |
| 11734373_a_at | CSPP1      | centrosome and spindle pole associated protein 1                    | NM_001077204    | 0,0327 | -1,6765 | 0,0359 | -1,7234 | 0,9906 | -1,0280 |
| 11758737_s_at | PGRMC2     | progesterone receptor membrane component 2                          | NM_006320       | 0,0212 | -1,6794 | 0,0242 | -1,6377 | 0,9906 | 1,0254  |
| 11751388_a_at | FEN1       | flap structure-specific endonuclease 1                              | NM_004111       | 0,0411 | -1,6808 | 0,0444 | -1,7135 | 0,9937 | -1,0195 |
| 11744699_a_at | TDP1       | tyrosyl-DNA phosphodiesterase 1                                     | NM_001008744    | 0,0269 | -1,6811 | 0,0338 | -1,5890 | 0,9906 | 1,0580  |
| 11757391_x_at | MRPL1      | mitochondrial ribosomal protein L1                                  | NM_020236       | 0,0269 | -1,6859 | 0,0367 | -1,5173 | 0,9906 | 1,1111  |
| 11720637_x_at | CXADR      | coxsackie virus and adenovirus receptor                             | NM_001207063    | 0,0465 | -1,6867 | 0,0497 | -1,7459 | 0,9910 | -1,0351 |
| 11716412_s_at | ALDH18A1   | aldehyde dehydrogenase 18 family, member A1                         | NM_001017423    | 0,0352 | -1,6886 | 0,0444 | -1,6115 | 0,9906 | 1,0478  |
| 11715697_a_at | NOLC1      | nucleolar and coiled-body phosphoprotein 1                          | NM_004741       | 0,0288 | -1,6905 | 0,0390 | -1,5574 | 0,9906 | 1,0855  |
| 11754598_s_at | DNAJA3     | DnaJ (Hsp40) homolog, subfamily A, member 3                         | NM_001135110    | 0,0373 | -1,6908 | 0,0412 | -1,6891 | 0,9997 | 1,0010  |
| 11716381_x_at | MPC2       | mitochondrial pyruvate carrier 2                                    | NM_001143674    | 0,0448 | -1,6910 | 0,0422 | -1,8607 | 0,9906 | -1,1004 |
| 11724492_a_at | LIG1       | ligase I, DNA, ATP-dependent                                        | NM_000234       | 0,0320 | -1,6920 | 0,0366 | -1,6913 | 0,9999 | 1,0005  |
| 11716380_a_at | MPC2       | mitochondrial pyruvate carrier 2                                    | NM_001143674    | 0,0447 | -1,6972 | 0,0447 | -1,7991 | 0,9906 | -1,0601 |
| 11721109_a_at | NAP1L3     | nucleosome assembly protein 1-like 3                                | NM_004538       | 0,0373 | -1,7062 | 0,0462 | -1,6208 | 0,9906 | 1,0527  |
| 11722213_at   | NPM3       | nucleophosmin/nucleoplamin 3                                        | NM_006993       | 0,0314 | -1,7067 | 0,0454 | -1,5311 | 0,9906 | 1,1147  |
| 11756145_s_at | SLC25A15   | solute carrier family 25 (mitochondrial carrier; ornithine carrier) | NM_014252       | 0,0297 | -1,7070 | 0,0340 | -1,7255 | 0,9949 | -1,0108 |
| 11732584_a_at | WRN        | Werner syndrome, RecQ helicase-like                                 | NM_000553       | 0,0215 | -1,7074 | 0,0252 | -1,6932 | 0,9942 | 1,0084  |
| 11744398_a_at | LIG1       | ligase I, DNA, ATP-dependent                                        | NM_000234       | 0,0338 | -1,7122 | 0,0447 | -1,5912 | 0,9906 | 1,0760  |
| 11763518_x_at | PMS1       | PMS1 postmeiotic segregation increased 1 (S. cerevisiae)            | NM_000534 /// ↑ | 0,0319 | -1,7157 | 0,0375 | -1,6866 | 0,9928 | 1,0173  |
| 11715834_x_at | RUVBL1     | RuvB-like 1 (E. coli)                                               | NM_003707       | 0,0421 | -1,7160 | 0,0461 | -1,7307 | 0,9972 | -1,0086 |
| 11751170_a_at | BZW2       | basic leucine zipper and W2 domains 2                               | NM_001159767    | 0,0449 | -1,7179 | 0,0500 | -1,7343 | 0,9965 | -1,0096 |
| 11746588_a_at | ALDH1B1    | aldehyde dehydrogenase 1 family, member B1                          | NM_000692       | 0,0346 | -1,7247 | 0,0454 | -1,6061 | 0,9906 | 1,0738  |
| 11715734_a_at | NIPSNAP1   | nipsnap homolog 1 (C. elegans)                                      | NM_001202502    | 0,0402 | -1,7289 | 0,0490 | -1,6598 | 0,9906 | 1,0416  |
| 11725709_a_at | WDHD1      | WD repeat and HMG-box DNA binding protein 1                         | NM_001008396    | 0,0280 | -1,7298 | 0,0411 | -1,5257 | 0,9906 | 1,1338  |
| 11734941_x_at | FAM212B    | family with sequence similarity 212, member B                       | NM_019099 /// ↑ | 0,0269 | -1,7312 | 0,0357 | -1,5746 | 0,9906 | 1,0995  |
| 11719324_x_at | PTEN       | phosphatase and tensin homolog                                      | NM_000314       | 0,0255 | -1,7413 | 0,0338 | -1,5595 | 0,9906 | 1,1166  |
| 11743582_a_at | EEF1E1     | eukaryotic translation elongation factor 1 epsilon 1                | NM_001135650    | 0,0267 | -1,7453 | 0,0306 | -1,7287 | 0,9949 | 1,0096  |
| 11726837_a_at | SCAI       | suppressor of cancer cell invasion                                  | NM_001144877    | 0,0447 | -1,7463 | 0,0482 | -1,7963 | 0,9920 | -1,0286 |
| 11744275_a_at | WDR12      | WD repeat domain 12                                                 | NM_018256       | 0,0430 | -1,7468 | 0,0497 | -1,7155 | 0,9949 | 1,0182  |
| 11724919_a_at | HSD17B8    | hydroxysteroid (17-beta) dehydrogenase 8                            | NM_014234       | 0,0384 | -1,7487 | 0,0500 | -1,6143 | 0,9906 | 1,0832  |
| 11763093_x_at | GYPB       | glycophorin B (MNS blood group)                                     | NM_002100 /// ↑ | 0,0346 | -1,7490 | 0,0434 | -1,6685 | 0,9906 | 1,0482  |
| 11731984_at   | CERKL      | ceramide kinase-like                                                | NM_001030311    | 0,0236 | -1,7545 | 0,0269 | -1,6983 | 0,9906 | 1,0331  |
| 11751479_a_at | CCDC152    | coiled-coil domain containing 152                                   | NM_001134848    | 0,0399 | -1,7560 | 0,0489 | -1,6754 | 0,9906 | 1,0481  |
| 11736985_a_at | NUBPL      | nucleotide binding protein-like                                     | NM_001201573    | 0,0374 | -1,7577 | 0,0497 | -1,6146 | 0,9906 | 1,0887  |
| 11719123_a_at | TIMELESS   | timeless circadian clock                                            | NM_003920       | 0,0214 | -1,7661 | 0,0252 | -1,6796 | 0,9906 | 1,0515  |
| 11727674_at   | RFXAP      | regulatory factor X-associated protein                              | NM_000538       | 0,0266 | -1,7724 | 0,0335 | -1,6544 | 0,9906 | 1,0713  |
| 11763965_s_at | MDN1       | MDN1, midasin homolog (yeast)                                       | NM_014611       | 0,0353 | -1,7770 | 0,0422 | -1,7199 | 0,9906 | 1,0332  |
| 11738840_a_at | NUDT10     | nudix (nucleoside diphosphate linked moiety X)-type 10              | NM_153183       | 0,0325 | -1,7798 | 0,0384 | -1,7299 | 0,9910 | 1,0289  |
| 11739820_at   | ZNF714     | zinc finger protein 714                                             | NM_182515       | 0,0413 | -1,7811 | 0,0476 | -1,7578 | 0,9951 | 1,0132  |
| 11740098_a_at | ANK1       | ankyrin 1, erythrocytic                                             | NM_000037 /// ↑ | 0,0324 | -1,7822 | 0,0342 | -1,8757 | 0,9906 | -1,0525 |
| 11741201_a_at | NAT10      | N-acetyltransferase 10 (GCN5-related)                               | NM_001144030    | 0,0305 | -1,7873 | 0,0395 | -1,6595 | 0,9906 | 1,0770  |

|               |          |                                                     |                 |        |         |        |         |        |         |
|---------------|----------|-----------------------------------------------------|-----------------|--------|---------|--------|---------|--------|---------|
| 11744515_a_at | SLC25A38 | solute carrier family 25, member 38                 | NM_017875       | 0,0269 | -1,7874 | 0,0384 | -1,5642 | 0,9906 | 1,1427  |
| 11715755_a_at | ATIC     | 5-aminoimidazole-4-carboxamide ribonucleotide f     | NM_004044       | 0,0252 | -1,7894 | 0,0313 | -1,6469 | 0,9906 | 1,0865  |
| 11758892_a_at | NDC1     | NDC1 transmembrane nucleoporin                      | NM_001168551    | 0,0442 | -1,7985 | 0,0497 | -1,7925 | 0,9997 | 1,0034  |
| 11733454_a_at | CCDC41   | coiled-coil domain containing 41                    | NM_001042399    | 0,0456 | -1,8005 | 0,0460 | -1,9348 | 0,9906 | -1,0746 |
| 11748467_a_at | ALDH18A1 | aldehyde dehydrogenase 18 family, member A1         | NM_001017423    | 0,0302 | -1,8068 | 0,0399 | -1,6621 | 0,9906 | 1,0870  |
| 11730404_at   | MEX3B    | mex-3 homolog B (C. elegans)                        | NM_032246       | 0,0212 | -1,8179 | 0,0231 | -1,6647 | 0,9906 | 1,0920  |
| 11741856_s_at | LOC65350 | zinc finger protein 658 pseudogene /// zinc finger  | NM_001032297    | 0,0249 | -1,8187 | 0,0359 | -1,5090 | 0,9906 | 1,2053  |
| 11729458_a_at | FANCI    | Fanconi anemia, complementation group I             | NM_001113378    | 0,0285 | -1,8193 | 0,0361 | -1,7242 | 0,9906 | 1,0552  |
| 11757551_a_at | MRPL3    | mitochondrial ribosomal protein L3                  | NM_007208       | 0,0251 | -1,8251 | 0,0308 | -1,6841 | 0,9906 | 1,0838  |
| 11739516_at   | CA8      | carbonic anhydrase VIII                             | NM_004056       | 0,0456 | -1,8278 | 0,0447 | -2,0089 | 0,9906 | -1,0991 |
| 11722825_at   | NCAPG    | non-SMC condensin I complex, subunit G              | NM_022346 /// ↑ | 0,0384 | -1,8323 | 0,0425 | -1,8291 | 0,9997 | 1,0017  |
| 11751171_x_at | BZW2     | basic leucine zipper and W2 domains 2               | NM_001159767    | 0,0269 | -1,8399 | 0,0342 | -1,7016 | 0,9906 | 1,0813  |
| 11740924_x_at | IMPDH2   | IMP (inosine 5'-monophosphate) dehydrogenase 2      | NM_000884       | 0,0320 | -1,8405 | 0,0447 | -1,6525 | 0,9906 | 1,1137  |
| 11721157_at   | NTHL1    | nth endonuclease III-like 1 (E. coli)               | NM_002528       | 0,0269 | -1,8426 | 0,0338 | -1,7234 | 0,9906 | 1,0692  |
| 11755807_a_at | DNA2     | DNA replication helicase/nuclease 2                 | NM_001080449    | 0,0271 | -1,8451 | 0,0337 | -1,7981 | 0,9906 | 1,0262  |
| 11757427_x_at | IMPDH2   | IMP (inosine 5'-monophosphate) dehydrogenase 2      | NM_000884       | 0,0341 | -1,8501 | 0,0462 | -1,6736 | 0,9906 | 1,1054  |
| 11715992_s_at | MCM2     | minichromosome maintenance complex compone          | NM_004526 /// ↑ | 0,0337 | -1,8544 | 0,0447 | -1,7021 | 0,9906 | 1,0895  |
| 11756160_x_at | CTNNA1   | catenin (cadherin-associated protein), alpha-like 1 | NM_003798       | 0,0302 | -1,8596 | 0,0356 | -1,8494 | 0,9990 | 1,0055  |
| 11752370_x_at | IMPDH2   | IMP (inosine 5'-monophosphate) dehydrogenase 2      | NM_000884       | 0,0288 | -1,8689 | 0,0369 | -1,7580 | 0,9906 | 1,0631  |
| 11715684_a_at | PPA1     | pyrophosphatase (inorganic) 1                       | NM_021129       | 0,0266 | -1,8689 | 0,0286 | -1,9173 | 0,9906 | -1,0259 |
| 11736528_a_at | SMC2     | structural maintenance of chromosomes 2             | NM_001042550    | 0,0297 | -1,8700 | 0,0395 | -1,7073 | 0,9906 | 1,0953  |
| 11757903_s_at | COL4A5   | collagen, type IV, alpha 5                          | NM_000495 /// ↑ | 0,0271 | -1,8711 | 0,0353 | -1,7382 | 0,9906 | 1,0765  |
| 11724862_at   | THNSL1   | threonine synthase-like 1 (S. cerevisiae)           | NM_024838       | 0,0269 | -1,8815 | 0,0377 | -1,6483 | 0,9906 | 1,1415  |
| 11715796_s_at | LUM      | lumican                                             | NM_002345       | 0,0345 | -1,8950 | 0,0444 | -1,7596 | 0,9906 | 1,0770  |
| 11723853_a_at | BCL11A   | B-cell CLL/lymphoma 11A (zinc finger protein)       | NM_018014 /// ↑ | 0,0325 | -1,8969 | 0,0334 | -2,1117 | 0,9906 | -1,1133 |
| 11722908_a_at | KLHL13   | kelch-like family member 13                         | NM_001168299    | 0,0272 | -1,9151 | 0,0350 | -1,8010 | 0,9906 | 1,0634  |
| 11742997_x_at | MCM3     | minichromosome maintenance complex compone          | NM_001270472    | 0,0271 | -1,9194 | 0,0340 | -1,8192 | 0,9906 | 1,0551  |
| 11758069_s_at | C1orf186 | chromosome 1 open reading frame 186                 | NM_001007544    | 0,0332 | -1,9224 | 0,0377 | -1,9061 | 0,9966 | 1,0086  |
| 11736366_x_at | MCM10    | minichromosome maintenance complex compone          | NM_018518 /// ↑ | 0,0319 | -1,9308 | 0,0363 | -1,9319 | 0,9999 | -1,0006 |
| 11736249_x_at | KIAA0101 | KIAA0101                                            | NM_001029989    | 0,0432 | -1,9338 | 0,0485 | -1,9358 | 0,9997 | -1,0010 |
| 11721859_at   | MIPEP    | mitochondrial intermediate peptidase                | NM_005932       | 0,0332 | -1,9379 | 0,0366 | -1,9734 | 0,9949 | -1,0183 |
| 11721699_a_at | PMS1     | PMS1 postmeiotic segregation increased 1 (S. ce)    | NM_000534 /// ↑ | 0,0341 | -1,9408 | 0,0436 | -1,8064 | 0,9906 | 1,0744  |
| 11725052_a_at | TOP1MT   | topoisomerase (DNA) I, mitochondrial                | NM_001258446    | 0,0332 | -1,9443 | 0,0410 | -1,8306 | 0,9906 | 1,0621  |
| 11723903_at   | PLEKHG1  | pleckstrin homology domain containing, family G     | (NM_001029884   | 0,0212 | -1,9708 | 0,0252 | -1,5984 | 0,9906 | 1,2329  |
| 11750140_x_at | TOP1MT   | topoisomerase (DNA) I, mitochondrial                | NM_001258446    | 0,0319 | -1,9754 | 0,0461 | -1,7205 | 0,9906 | 1,1481  |
| 11727839_x_at | ORC1     | origin recognition complex, subunit 1               | NM_001190818    | 0,0255 | -1,9788 | 0,0301 | -1,8955 | 0,9906 | 1,0440  |
| 11720884_a_at | HMBS     | hydroxymethylbilane synthase                        | NM_000190 /// ↑ | 0,0413 | -1,9856 | 0,0494 | -1,9056 | 0,9910 | 1,0420  |
| 11755227_x_at | ANK1     | ankyrin 1, erythrocytic                             | NM_000037 /// ↑ | 0,0255 | -2,0010 | 0,0334 | -1,8006 | 0,9906 | 1,1113  |
| 11718479_x_at | STAR     | steroidogenic acute regulatory protein              | NM_000349 /// ↑ | 0,0344 | -2,0014 | 0,0422 | -1,8892 | 0,9906 | 1,0594  |
| 11715814_a_at | TRAP1    | TNF receptor-associated protein 1                   | NM_001272049    | 0,0281 | -2,0027 | 0,0370 | -1,8320 | 0,9906 | 1,0932  |
| 11716982_at   | CMSS1    | cms1 ribosomal small subunit homolog (yeast)        | NM_001167924    | 0,0267 | -2,0050 | 0,0334 | -1,8662 | 0,9906 | 1,0743  |
| 11730300_a_at | FAM19A2  | family with sequence similarity 19 (chemokine (C-   | NM_178539       | 0,0248 | -2,0056 | 0,0269 | -1,9958 | 0,9985 | 1,0049  |
| 11728984_a_at | LOC10099 | monofunctional C1-tetrahydrofolate synthase, mit    | NM_001242767    | 0,0251 | -2,0208 | 0,0362 | -1,6397 | 0,9906 | 1,2324  |
| 11717775_s_at | GYPC     | glycophorin C (Gerbich blood group)                 | NM_001256584    | 0,0297 | -2,0223 | 0,0467 | -1,6809 | 0,9906 | 1,2031  |
| 11753899_a_at | DLEU1    | deleted in lymphocytic leukemia 1 (non-protein co   | NM_005887 /// ↑ | 0,0494 | -2,0263 | 0,0447 | -2,4203 | 0,9906 | -1,1944 |
| 11723995_a_at | GLCC1    | glucocorticoid induced transcript 1                 | NM_138426       | 0,0377 | -2,0396 | 0,0422 | -2,0401 | 1,0000 | -1,0003 |
| 11732058_a_at | CDC7     | cell division cycle 7                               | NM_001134419    | 0,0391 | -2,0430 | 0,0494 | -1,8774 | 0,9906 | 1,0882  |
| 11726554_at   | C1orf186 | chromosome 1 open reading frame 186                 | NM_001007544    | 0,0455 | -2,0593 | 0,0447 | -2,2832 | 0,9906 | -1,1087 |
| 11732057_a_at | CDC7     | cell division cycle 7                               | NM_001134419    | 0,0447 | -2,0699 | 0,0497 | -2,0846 | 0,9993 | -1,0071 |
| 11720867_x_at | PLAC8    | placenta-specific 8                                 | NM_001130715    | 0,0427 | -2,0727 | 0,0448 | -2,1580 | 0,9912 | -1,0412 |
| 11759625_at   | LOC10050 | uncharacterized LOC100506965                        | XR_110300 /// X | 0,0232 | -2,0798 | 0,0269 | -1,9926 | 0,9906 | 1,0438  |
| 11747185_x_at | ANK1     | ankyrin 1, erythrocytic                             | NM_000037 /// ↑ | 0,0420 | -2,0874 | 0,0497 | -2,0058 | 0,9915 | 1,0407  |
| 11758478_s_at | CDCA7    | cell division cycle associated 7                    | NM_031942 /// ↑ | 0,0295 | -2,0876 | 0,0384 | -1,9092 | 0,9906 | 1,0934  |
| 11744519_a_at | POLE2    | polymerase (DNA directed), epsilon 2, accessory     | NM_001197330    | 0,0283 | -2,1104 | 0,0398 | -1,8323 | 0,9906 | 1,1518  |
| 11721649_a_at | GPATCH4  | G patch domain containing 4                         | NM_015590 /// ↑ | 0,0346 | -2,1206 | 0,0444 | -1,9519 | 0,9906 | 1,0864  |
| 11762504_a_at | ZRANB3   | zinc finger, RAN-binding domain containing 3        | NM_032143       | 0,0265 | -2,1245 | 0,0338 | -1,8945 | 0,9906 | 1,1214  |
| 11722964_a_at | AMMECR1  | Alport syndrome, mental retardation, midface hyp    | NM_001025580    | 0,0269 | -2,1327 | 0,0338 | -1,9531 | 0,9906 | 1,0919  |
| 11736367_a_at | MCM10    | minichromosome maintenance complex compone          | NM_018518 /// ↑ | 0,0311 | -2,1433 | 0,0388 | -1,9846 | 0,9906 | 1,0800  |
| 11758536_s_at | KCTD15   | potassium channel tetramerisation domain contain    | NM_001129994    | 0,0271 | -2,1739 | 0,0338 | -2,0656 | 0,9906 | 1,0525  |
| 11740178_x_at | ANKLE1   | ankyrin repeat and LEM domain containing 1          | NM_001278443    | 0,0292 | -2,1940 | 0,0388 | -1,9574 | 0,9906 | 1,1209  |
| 11758572_s_at | HELLS    | helicase, lymphoid-specific                         | NM_018063       | 0,0219 | -2,2234 | 0,0269 | -2,0355 | 0,9906 | 1,0923  |
| 11718477_a_at | STAR     | steroidogenic acute regulatory protein              | NM_000349 /// ↑ | 0,0277 | -2,2261 | 0,0342 | -2,1271 | 0,9906 | 1,0466  |
| 11726386_at   | PDZD8    | PDZ domain containing 8                             | NM_173791       | 0,0442 | -2,2461 | 0,0498 | -2,2295 | 0,9993 | 1,0075  |
| 11725211_a_at | PLCXD1   | phosphatidylinositol-specific phospholipase C, X    | CN_018390 /// ↑ | 0,0258 | -2,2811 | 0,0314 | -2,1181 | 0,9906 | 1,0770  |
| 11739482_x_at | PLAC8    | placenta-specific 8                                 | NM_001130715    | 0,0277 | -2,2976 | 0,0384 | -1,9607 | 0,9906 | 1,1718  |
| 11753712_x_at | HBB      | hemoglobin, beta                                    | NM_000518       | 0,0449 | -2,3117 | 0,0483 | -2,4328 | 0,9910 | -1,0524 |

|               |          |                                                        |              |        |         |        |         |        |         |
|---------------|----------|--------------------------------------------------------|--------------|--------|---------|--------|---------|--------|---------|
| 11745300_a_at | DNAJC6   | DnaJ (Hsp40) homolog, subfamily C, member 6            | NM_001256864 | 0,0255 | -2,3388 | 0,0289 | -2,2327 | 0,9906 | 1,0476  |
| 11729291_a_at | SLC25A37 | solute carrier family 25 (mitochondrial iron transp    | NM_016612    | 0,0406 | -2,3744 | 0,0491 | -2,2363 | 0,9906 | 1,0618  |
| 11715167_at   | ARHGAP2  | Rho GTPase activating protein 22                       | NM_001256024 | 0,0395 | -2,3933 | 0,0480 | -2,2392 | 0,9906 | 1,0688  |
| 11736538_s_at | RHCE     | /// R Rh blood group, CcEe antigens /// Rh blood group | NM_001127691 | 0,0403 | -2,4524 | 0,0488 | -2,3118 | 0,9906 | 1,0608  |
| 11755533_a_at | GPR125   | G protein-coupled receptor 125                         | NM_145290    | 0,0346 | -2,4653 | 0,0375 | -2,5777 | 0,9910 | -1,0456 |
| 11732805_at   | EPX      | eosinophil peroxidase                                  | NM_000502    | 0,0363 | -2,4975 | 0,0474 | -2,2130 | 0,9906 | 1,1286  |
| 11742315_s_at | RHCE     | /// R Rh blood group, CcEe antigens /// Rh blood group | NM_001127691 | 0,0303 | -2,5684 | 0,0351 | -2,5996 | 0,9964 | -1,0121 |
| 11732341_at   | BCL11A   | B-cell CLL/lymphoma 11A (zinc finger protein)          | NM_018014    | 0,0255 | -2,6646 | 0,0282 | -2,6721 | 0,9997 | -1,0028 |
| 11732340_at   | BCL11A   | B-cell CLL/lymphoma 11A (zinc finger protein)          | NM_018014    | 0,0337 | -2,7322 | 0,0353 | -2,9985 | 0,9906 | -1,0975 |
| 11744559_a_at | SLC25A37 | solute carrier family 25 (mitochondrial iron transp    | NM_016612    | 0,0285 | -2,7891 | 0,0327 | -3,0027 | 0,9906 | -1,0766 |
| 11745021_a_at | MYC      | v-myc myelocytomatosis viral oncogene homolog          | NM_002467    | 0,0390 | -3,0782 | 0,0411 | -3,2091 | 0,9928 | -1,0425 |
| 11723070_a_at | CYTL1    | cytokine-like 1                                        | NM_018659    | 0,0252 | -3,0966 | 0,0269 | -3,3152 | 0,9906 | -1,0706 |
